1 **THE PROTO-ONCOGENE FYN INHIBITS THE ANTI-GLIOBLASTOMA IMMUNE RESPONSE**

2  
3  
4 Andrea Comba<sup>1,2</sup>, Patrick J Dunn<sup>1,2</sup>, Anna E Argento<sup>1,2</sup>, Padma Kadiyala<sup>1,2</sup>, Maria Ventosa<sup>1,2</sup>,  
5 Daniel B Zamler<sup>1,2</sup>, Priti Patel<sup>1,2</sup>, Lili Zhao<sup>3</sup>, Felipe J Nunez<sup>1,2</sup>, Maria G Castro<sup>1,2</sup>, Pedro R.  
6 Lowenstein<sup>1,2,\*</sup>  
7

8 <sup>1</sup>Department of Neurosurgery, University of Michigan Medical School, Ann Arbor, MI 48109

9 <sup>2</sup>Department of Cell and Developmental Biology, University of Michigan Medical School, Ann  
10 Arbor, MI 48109

11 <sup>3</sup>Department of Biostatistics, University of Michigan Medical School, Ann Arbor, MI 48109

12  
13 \*Corresponding Author: Pedro R Lowenstein. MSRB II, Room 4570, Department of Neurosurgery  
14 University of Michigan School of Medicine, 1150 West Medical Center Drive, Ann Arbor, MI  
15 48109-5689. Phone (office) 734-764-0851. Email: pedrol@umich.edu  
16  
17  
18  
19  
20  
21  
22  
23  
24  
25  
26

27 **ABSTRACT**

28 *In vivo* genetic knockdown of the proto-oncogene Fyn in immunocompetent mouse glioma models  
29 significantly extended survival by 25%-77%. GSEA analysis of DE genes revealed a highly  
30 significant enrichment of gene ontologies related to immune function such as STAT-1 regulated  
31 cell differentiation, IFN $\gamma$  signaling, T cell activation, and NK cytotoxicity. At the gene level, STAT1,  
32 and downstream genes IFN $\gamma$ , IRF1, NLRC5, CIITA, TAP1, CXCL9, CCL5, H2-Q4 and H2-DMa  
33 were upregulated in Fyn-knockdown tumors. These data indicate that Fyn downregulation  
34 increases expression of STAT1, a major coordinator of immune responses. These data predict  
35 that knockdown of Fyn should only extend survival in immunocompetent mice. Indeed, in immune-  
36 deficient NSG mice the effect of Fyn-knockdown was minimal. Our data indicate that Fyn exerts  
37 its main pro-tumoral activity by downregulating the anti-glioma immune response. We propose  
38 the specific inhibition of Fyn as a novel therapeutic target in gliomas.

39

40

41

42

43

44

45

46

47

48

49

50

51

52

## 53 INTRODUCTION

54 Glioblastomas (GBM) are the most frequent and aggressive primary tumors of the central nervous  
55 system <sup>1</sup>. Molecular characterization of human gliomas and genetically engineered mouse models  
56 allow to study the role of individual genes in glioma development, growth, and overall malignity <sup>2</sup>.  
57 Cellular transformation and increased glioma malignity is in large part a consequence of increased  
58 activity of constitutively active/mutated growth factor receptors (EGFR, PDGFR, HGF/MET,  
59 RTK/RAS/PI3K), and/or their downstream transduction pathways <sup>3</sup>. In addition, tumors can  
60 increase their aggressiveness by downregulating innate and adaptive immune responses in the  
61 tumor microenvironment <sup>4,5</sup>. This changes the proliferation, invasion, and survival of glioma cells.  
62 A remaining experimental challenge is to discover the molecules involved in the transduction of  
63 these oncogenic signals. Whether these signaling pathways also induce changes in the tumor  
64 microenvironment remains unknown.

65 To identify signaling pathways that modulate driver gene activity in glioma tumor progression and  
66 malignancy we utilized RNA-sequencing and compared gene expression in highly malignant stem  
67 cells derived from NPA (Nras, shp53, shATRx and IDH-Wild Type) gliomas with glioma stem cells  
68 derived from less aggressive tumors NPAI (Nras, shp53, shATRx IDH1<sup>R132H</sup>). The set of  
69 differentially expressed (DE) genes was mined using bioinformatics and network analysis. The  
70 result was a heterogeneous and non-random network, i.e., the graph of number of gene nodes  
71 vs. the degree of each node obeys a power law. This predicts the existence of hubs, gene nodes  
72 with high connectivity. Fyn tyrosine kinase was one of the four most highly connected hubs. We  
73 tested the hypothesis that Fyn is a significant transducer of glioma growth and malignancy.

74 Fyn tyrosine kinase is a non-receptor membrane protein member of the Src family of tyrosine  
75 kinases <sup>6</sup>. In normal physiology Fyn regulates neuronal development and signaling in T and B-  
76 cells <sup>7-11</sup>. In oncology, Fyn has been described as a proto-oncogene in pancreas, prostate, breast,  
77 and hematological cancers. It has been shown that the oncogenic pathways of EGFR, PDGFR,  
78 HGF/MET or RTK/RAS/PI3K signal through Fyn to increase invasion and reduce cell death <sup>12-14</sup>.

79 In gliomas Fyn has been associated with increased cell migration and proliferation in *in vitro*  
80 studies, but has provided contradictory results when tested *in vivo*<sup>12,15,16</sup>. *In vivo* studies using a  
81 glioma orthotopic xenograft model for Fyn knockdown showed no difference in survival compared  
82 to control<sup>15</sup>. In glioma, studies inhibiting SFK with the non-specific inhibitors Saracatinib,  
83 Dasatinib or PP2 decreased cell proliferation, migration and invasion<sup>12,17-19</sup> *in vitro*, and tumor  
84 growth in immune-suppressed animals. Studies in immune-suppressed animals, necessary when  
85 using PDX models, are nevertheless limited, as they do not allow us to assess potential effects  
86 on the immune system.

87 Network analysis identified Fyn as a gene with potentially important regulatory functions. To test  
88 this hypothesis, we analyzed the behavior of glioma cells transduced with shRNA-Fyn *in vitro*,  
89 and in immune-competent, and immune-deficient mice. *In vitro* we detected a reduction in  
90 proliferation and migration. *In vivo*, selective downregulation of Fyn increased survival of tumor  
91 bearing m and decreased tumor growth and malignancy. Increased survival of shRNA-Fyn  
92 transduced gliomas is lost when such tumors are implanted into immunosuppressed mice.

93 In summary, data from our transcriptomic and network analysis, the genetic downregulation of  
94 Fyn, and experiments in immune-competent v. immune-deficient mice strongly suggests that an  
95 important contribution of the pro-tumoral effect of Fyn might be exerted through inhibition of anti-  
96 glioma immune responses. We propose that Fyn is a novel target to inhibit tumor progression,  
97 increase the sensitivity of gliomas to immune attack, and could be exploited for the personalized  
98 treatment of glioma patients.

99 **RESULTS**

100

101 **Network analysis of differentially expressed genes in mouse and human glioma of high vs.**  
102 **low malignant behavior. Identification of Fyn as a potential regulator of glioma**  
103 **progression.**

104 Differential expression (DE) of genes in mouse and human glioma primary stem cells was  
105 analyzed to identify genes that regulate glioblastoma progression. We compared phenotypically  
106 more aggressive NPA-neurospheres (Nras, shp53, shATR<sub>x</sub> and IDH-Wild Type) with less  
107 malignant NPAI-neurospheres (Nras, shp53, shATR<sub>x</sub> IDH1<sup>R132H</sup>)<sup>20</sup>. The network of DE genes  
108 revealed the existence of a heterogeneous, non-random, network whose node degree distribution  
109 (number of nodes v. node degree) obeys a power law (correlation=0.935; r<sup>2</sup>=0.792). These  
110 characteristics predict the existence of hubs, which are highly connected nodes that play essential  
111 roles in network function. We identified Fyn to be one of the most highly connected nodes  
112 (Degree: 63; 4<sup>th</sup> node from top node) in the network (**Fig. 1a**).

113 To analyze the role of Fyn in human glioma derived stem cells, we extended our network analysis  
114 to two human glioma stem cells of differential aggressiveness<sup>21</sup>. We compared DE genes of  
115 MGG8-adherent cells, a less aggressive cell type which does not form tumors in NSG mice, with  
116 MGG8-Spheres cells, a more aggressive cell type that does form tumors in NSG mice. This  
117 analysis also revealed Fyn to be one of the most connected nodes in the network (Degree: 47;  
118 7<sup>th</sup> node from top node) (**Fig. 1c**). **Fig. (1b)** and **(1d)** display the set of nodes that are first  
119 neighbors of Fyn. Detailed information of genes present in each of networks is shown in  
120 **Supplementary Table 1 a-b**.

121 We then performed a network functional enrichment analysis (GSEA) to determine the Gene  
122 Ontologies (GO)/Biological Process enriched in the networks using the Reactome App of  
123 Cytoscape. We identified the most relevant GO Biological Processes involving Fyn for NPA vs  
124 NPAI cells and MGG8-Sphere vs MGG8-Adherent cells using a cutoff of FDR<0.2, p-value<0.05

125 **(Supplementary Table 2a-d)**. GO term analysis from both networks identified 14 shared GO  
126 Biological Processes involving Fyn **(Fig. 1e)**. The full list of GO terms are shown in  
127 **Supplementary, Tables 2a-b** and **2c-d** respectively. These GO terms represent functions by  
128 which Fyn is thought to exerts its effects. To establish whether Fyn levels correlate with glioma  
129 malignancy, we used RNA-Sequencing and Microarray data from the Gliovis  
130 (<http://gliovis.bioinfo.cnio.es>) database. Fyn mRNA expression levels were higher in different  
131 types of human gliomas (i.e. Unknown, Mixed glioma, Oligodendroglioma, Astrocytoma and  
132 Glioblastoma) when compared to normal brain tissue according to Rembrandt, TCGA, and  
133 Gravendeel databases **(Fig. 2a-c)**. Western blot analysis of mouse and human glioma stem cells  
134 revealed that Fyn protein levels correlate positively with tumor malignancy **(Fig. 2d)**.

135

136 **Saracatinib, a Src family kinase inhibitor, impairs cell viability and migration in correlation**  
137 **with glioma cell malignancy.**

138 Due to Fyn being a hub in our network analysis and a potential regulator of glioma progression,  
139 we sought to determine whether inhibiting Fyn activity has an effect on the *in vitro* proliferation  
140 and migration of glioma cells. Western blot (WB) analysis shows that the Src family kinase (SFK)  
141 inhibitor, Saracatinib, inhibited SFK activation. A low dose of 0.5  $\mu$ M Saracatinib inhibited the SFK  
142 activation site (Y416 phosphorylation) in all glioma cells. Moreover, Saracatinib significantly  
143 inhibited the phosphorylation of the inactive site Y530 of SFKs at 0.5  $\mu$ M in NP cells, but higher  
144 doses of the inhibitor were required to achieve a similar decrease of Y530 phosphorylation in  
145 NPA, GL26 and NPAI cells. We observed that Fyn protein levels were unchanged due to the  
146 Saracatinib treatment in NP, NPA and GL26 cells. However, we observed that Fyn protein levels  
147 were upregulated in NPAI cells due to the Saracatinib treatment **(Fig. 3a)**. We also evaluated cell  
148 proliferation and cell migration in response to Saracatinib. Saracatinib significantly decreased cell  
149 viability in GL26, NP and NPA cells in a dose-dependent manner after 72 and 96 hours of  
150 treatment, but did not have an effect on NPAI cells **(Fig. 3b)**. However, the Saracatinib DL50 was

151 at higher doses than doses shown to inhibit SFK-phosphorylation (**Fig. 3a**). Cell migration  
152 determined by Transwell migration assay, showed that Saracatinib significantly decreased  
153 migration of NP, NPA and GL26 cells in a dose dependent manner, but only had a less strong  
154 effect on the migration of NPAI cells (**Fig. 3c and 3d**). Using human glioma stem cells, we also  
155 demonstrated that Saracatinib decreased cell proliferation and migration in MGG8-spheres more  
156 effectively than MGG8-adherent cells (**Supplementary Fig. 1a and 1b**). These results suggest  
157 that the inhibition of SFK activity by Saracatinib treatment has a greater effect on cell migration  
158 than on proliferation. These experiments demonstrate the effects of SFK on the behavior of glioma  
159 stem cells. They do not allow us to pinpoint the individual effects of Fyn. To do so, we performed  
160 genetic knockdown of Fyn expression.

161

#### 162 **Genetic knockdown of Fyn reduces *in vitro* glioma cell proliferation and migration**

163 To evaluate the effects of Fyn in glioma cells, we generated stable cell lines with Fyn knockdown  
164 using lentiviral vectors expressing shRNA against Fyn. We chose two mouse glioma cell types  
165 that are highly aggressive (NP, NPA) to achieve the Fyn knockdown. WB analysis in NP and NPA  
166 cells showed that two shRNAs (shFyn #1 and shFyn#2) decreased Fyn protein levels compared  
167 with the non-target (NT)-control vector (**Supplementary Fig. 2a-b**). ShFyn #2 displayed a  
168 stronger knockdown for Fyn and was chosen for all studies described further. The level of  
169 phosphorylation of the SFK active site P-Y416 was decreased upon Fyn downregulation.  
170 Importantly Src expression was not reduced post Fyn knockdown, confirming the specificity of the  
171 shRNA-Fyn (**Supplementary Fig. 2a-b**). We evaluated the effect of Fyn knockdown on glioma  
172 cells' proliferation. We found that NPA and NP cells that were knocked for Fyn exhibited a  
173 significantly decreased cell proliferation compared their corresponding control cells (**Fig. 4a-b**).  
174 Transwell migration assays were performed to assess the effect of Fyn on glioma cell migration  
175 *in vitro*. The analysis showed that Fyn knockdown significantly decreased the ability of NP and  
176 NPA cells to migrate through the trans-well membrane in response to CXL12, EGF and FGF.

177 Migration of cells that were expressing shFyn #2 significantly decreased compared to cells that  
178 were expressing shFyn #1 (**Fig. 4c-d**). These results indicate that Fyn knockdown has a strong  
179 effect on cell proliferation and migration in glioma cells.

180

### 181 **Knockdown of Fyn reduces tumor growth and prolongs survival in an intracranial mouse** 182 **glioma model**

183 To assess if knocking down Fyn has an effect on tumor development *in vivo*, we used an  
184 implantable syngeneic murine glioma model. Intracranial NP-NT or NP-shFyn tumors were  
185 established in immunocompetent mice. Median survival was significantly increased in animals  
186 harboring tumors with Fyn knockdown (MS: 34 days) compared with the NP- NT control group  
187 (MS: 27 days) (**Fig 4e**). Moreover, we analyzed the effect of Fyn *in vivo* through intracranial  
188 implantation of NPA-NT and NPA-shFyn cells. Survival analysis also demonstrated that tumors  
189 harboring the knockdown of Fyn had a significantly higher median survival (MS: 30 days) than  
190 the control group (MS: 20) (**Fig. 4g**).

191 Immunofluorescence analysis displayed the downregulation of Fyn expression levels in the NP-  
192 shFyn and NPA-shFyn tumor tissues compared with their corresponding controls (**Fig. 4f-h**).  
193 Moreover, we observed that tumor growth and development was decreased with Fyn  
194 downregulation. *In vivo* bioluminescence imaging and quantification of tumors at day 13 post  
195 tumor implantation showed that NP-Fyn knockdown tumors exhibited significantly lower  
196 bioluminescence signal (Photon/second) compared to the control group (**Fig. 4i**). Additionally,  
197 tumor size evaluation at necropsy showed a correlation with *in vivo* tumor bioluminescence  
198 analysis. NP-shFyn tumors had a smaller tumor size at 25 days than the control NP-NT tumors  
199 (**Fig. 4j**). Taken together, these results suggest that the individual downregulation of Fyn is able  
200 to decrease glioma growth and malignancy *in vivo*.

201



202 **Fyn knockdown reduces tumor malignancy and prolongs the survival of mice harboring**

203 **GEMM tumors**

204 The above results suggest that Fyn is a potent gene involved in a pro-tumorigenic glioma  
205 phenotype. The Sleeping Beauty Transposon System GBM model (GEMM) was used to  
206 understand the function of Fyn in *de novo* tumors generated from the host brain progenitors cells<sup>2</sup>.

207 We generated a Fyn-deficient genetically engineered mouse glioma model (**Fig. 5a-b**). We  
208 performed the cloning of two different shRNAs for Fyn into the PT2-GFP4 vector. We corroborated  
209 the efficacy of the shRNAs of Fyn by WB analysis (**Fig. 5c**). The shFyn-(b) was selected for the  
210 GEMM glioma generation. We generated tumors harboring different genotype combinations. We  
211 induced tumors by: (1) NRAS pathway activation in combination with shp53 (NP); (2) NRAS  
212 activation, shp53 and shFyn (NPF), (3) NRAS, shp53, and shATRAX (NPA), (4) shp53, NRAS,  
213 shATRAX and shFyn (NPAF), (5) shp53, NRAS and PDGF $\beta$  (NPD), (6) shp53, NRAS, PDGF $\beta$  and  
214 shFyn (NPDF) (**Fig. 5d**). We were able establish tumors with all the experimental groups.

215 Downregulation of Fyn increased median survival (MS) compared with their control groups (**Fig.**  
216 **6-a-c**). The downregulation of Fyn in the NPF group displayed an increased MS of 131 days  
217 compared with 94 days in the NP control group (**Fig. 6a**). The experimental group with knockdown  
218 of Fyn in the context of ATRX loss (NPAF) exhibited an increased survival (MS: 142 days)  
219 compared with the NPA control (MS: 80 days), (**Fig. 6b**). In the third experimental group, Fyn  
220 knockdown plus PDGF $\beta$  ligand upregulation (NPDF), also displayed an increased MS of 108 days  
221 compared with the NPD control group (MS: 69 days) (**Fig. 6c**). We evaluated the expression of  
222 Fyn in tumor tissue by immunofluorescence. We corroborated the downregulation of Fyn protein  
223 in all experimental groups as shown in **Fig. 6d, 6e** and **6f** respectively. In addition, *in vivo*  
224 bioluminescence imaging signal intensity was reduced in Fyn knockdown groups, indicating  
225 slower tumor development. Further, we analyzed tumor malignancy by histopathology of tumors.  
226 There was no evidence of significant differences in glioma malignant pathological markers. Both  
227 Fyn-knockdown and control tumors contained pseudo-palisades, necrotic areas, hemorrhages,

228 micro-vascular proliferation, giant cells, a mesenchymal sarcomatous component, and small cells  
229 (**Fig. 6g, h, i**). Changes in individual pathology parameters are detailed in **Fig. 6j**. We further  
230 evaluated cellular proliferation of the tumor by immunostaining of P-H3-Serine-10. Quantification  
231 demonstrated a significant decrease in the ratio of P-H3-S10 cells per total cells in Fyn knockdown  
232 groups (**Fig. 6k-m**). These data demonstrate that Fyn downregulation increases animal survival  
233 by decreasing tumor development and proliferation.

234

### 235 **RNA Sequencing and bioinformatics analysis indicates immune activation in Fyn** 236 **knockdown as a mechanism in glioma growth and malignancy modulation**

237 RNA Sequencing and bioinformatics analysis was used to uncover the mechanism by which Fyn  
238 knockdown leads to the inhibition of tumor growth and progression. These studies were performed  
239 on NP and NP-shFyn genetically engineered gliomas. RNA-seq analysis of NP-shFyn tumors  
240 versus NP tumors revealed a group of 567 differentially expressed genes. From the total DE  
241 genes, 226 genes were upregulated and 341 genes were downregulated (**Fig. 7a**). Using network  
242 analysis (i.e., Cytoscape) we analyzed the functional interaction of the DE genes resulting from  
243 Fyn knockdown. Up-regulated genes (red border node) and down-regulated genes (green border  
244 node) are shown in the network (**Fig. 7b**). We found that the following pathways were impacted  
245 in the network: Extracellular matrix organization,  $\beta$ 1 integrin cell surface interactions, signaling by  
246 PDGF, ECM-receptor interaction, signaling by interleukins and IFN $\gamma$  among others  
247 (**Supplementary Fig. 3a and Supplementary Table 3**).

248 In addition, the analysis of the network interactions revealed STAT1 gene (Degree: 20) as the  
249 highest connected node in the network followed by ITGA2 (Degree:15), ITGA3 (Degree: 15),  
250 ITGA9 (Degree: 14), GNA14 (Degree:14), ITGBL1 (Degree: 13), ITGAL (Degree: 11) and  
251 CAMK2A (Degree: 11) (**Fig. 7b**). These genes represent the leading regulators of the network.  
252 These genes are part of different functional modules, formed by highly interacting group of genes  
253 in the network. We analyzed the functional enrichment pathways impacted in each module (**Fig.**

254 **7c**). We found that the ITGA module (M0) regulated extracellular matrix organization, ECM  
255 receptor interactions, and integrin signaling. The STAT1 module (M1) regulated immune  
256 functions including the JAK-STAT pathways, cell differentiation of Th1, Th2 and Th17, IFN $\gamma$   
257 signaling, T cell activation and NK cell mediated cytotoxicity. The GNA14 module (M2) mainly  
258 modulated the Wnt signaling pathways and the cadherin signaling pathways. The CAMK2A  
259 module (M4) was involved in cAMP signaling, EGFR and PDGF signaling, and RAF/MAP kinase  
260 cascade. These results show that the immune pathways modulated by STAT-1 are the most  
261 enriched in the network (**Fig. 7c**).

262 The functional associated Gene Ontologies (GO) by gene set enrichment analysis (GSEA)  
263 suggest that Fyn knockdown induces a strong activation of immune response in our GEMM (**Fig.**  
264 **7d**). The analysis showed that 315 / 709 GO terms were upregulated in NPF gliomas and 24 GO  
265 terms were significant at FDR < 0.1 and nominal p-value < 0.05 (**Fig 4d**). However, there were  
266 no downregulated GO terms in NPF that were significantly enriched at a FDR <0.1 and p-value  
267 <0.05. At a less stringent FDR<1 and p-value <0.05, 15 downregulated GO terms were  
268 significantly enriched in the NPF gliomas (**Supplementary Fig 3b**). Detailed enrichment results  
269 are shown (**Supplementary Table 4a and 4b**). The analysis of the upregulated GO terms  
270 indicated that the GO: "Cell Chemotaxis" (FDR: 5.94E-04 and NES: 2.68) and GO: "Immune  
271 response" (FDR: 0.016 and NES: 2.29) are some of the most significantly enriched biological  
272 functions elicited by Fyn downregulation (**Fig. 7e**). The analysis also included significant immune  
273 related GO terms such as: "Leukocyte Chemotaxis", "Innate Immune Response", "Response to  
274 Interferon Gamma" and "Adaptive Immune Response (**Fig. 7e**)". These GO terms are involved in  
275 the mechanism by which Fyn knockdown decreases glioma malignancy. Details of the selected  
276 GO terms are shown in **Supplementary Table 5a-f**. The enrichment plots with the Running  
277 Enrichment Score and the positions of genes in the selected GO terms are shown in **Fig. 7e** and  
278 **Supplementary Fig. 3c**.

279 The mRNA expression analysis of NP tumors compared with Fyn knockdown NPF tumors for the  
280 GO terms, “Immune response” and “Cell Chemotaxis”, indicated a group of highlighted DE genes.  
281 The GO Immune response exhibited significant increased levels of genes, such as: STAT1 (q-  
282 value=0.04), ITGAL (q-value=0.006), CIITA (q-value=0.004), IRF1 (q-value=0.01), IRF8 (q-  
283 value=0.004) NLRC5 (q-value= 0.004) and TAP1 (q-value= 0.009). (**Fig. 8a, left panel**). The GO:  
284 “Cell Chemotaxis” include the following differentially expressed genes: ITGA9 (q-value=0.004),  
285 IFNG (q-value=0.004), CXCL9 (q-value=0.004), CCL1 (q-value= 0.004), CCL5 (q-value= 0.04)  
286 and PDGFRB (q-value=0.02) (**Fig. 8a, right panel**). All DE gene levels of the respective GO are  
287 listed in the heat map graphs (**Fig 8a**). We next explored to see if Fyn affects the anti-tumor  
288 immune system response *in vivo*.

289 Tumors were generated through intracranial implantations of NPA-Empty and NPA-shFyn cells in  
290 immune-compromised mice (NSG) and in immune-competent mice (C57BL/6) (**Fig. 8b**). We  
291 observed that Fyn knockdown tumors had a significantly increased MS (24 vs 34 dpi) in immune-  
292 competent mice than in immune-compromised mice when compared to the control tumors. We  
293 also observed a small increase in MS (22 vs 24 dpi) of NSG mice bearing NPA-shFyn tumors  
294 compared to mice bearing NPA-Empty tumors (**Fig. 8b**).

295 We next studied the impact of Fyn downregulation on STAT1 signaling and anti-tumor immune  
296 response. We used the cBioPortal cancer genomics correlation analysis to compare gene  
297 expression and network structure of our GEMM, with the human glioma TCGA gene expression  
298 data. The analysis indicated that decreased levels of Fyn in the GEMM and human gliomas were  
299 inversely correlated with STAT1 levels and the functional related genes CXCL9, NLRC5, CIITA,  
300 IL12RB1, CD3E, IL2R, IRF1, IRF8, BATF2, SH2D1A and SLAMF7 (**Fig. 8c**). Taken together,  
301 these results suggest a strong effect of Fyn downregulation in the activation of the anti-tumor  
302 immune response through the modulation of the described pathways.

## 303 **DISCUSSION**

304 In this study we demonstrate that the knockdown of Fyn expression uncovers its capacity to  
305 downregulate the anti-glioma immune response. As a proto-oncogene Fyn's typical cell  
306 autonomous effects, such as changes in cell proliferation and migration, had been studied earlier,  
307 and were confirmed by us. The existence of non-cell autonomous effects of Fyn on the capacity  
308 of tumor cells to respond to the immune system, and on the activation of anti-glioma immune  
309 responses, were not previously suspected. We propose that most of the pro-glioma effects of Fyn  
310 are the result of its capacity to inhibit anti-tumor immune responses.

311 Fyn is a non-receptor tyrosine-protein kinase member of the Src family kinases with important  
312 roles in the immune system, the nervous system, and most recently, in cancer. In the CNS, it  
313 regulates axon guidance, cell proliferation, cell adhesion and cell migration during brain  
314 development <sup>11,13,22,23</sup>. In T cells Fyn induces cell-autonomous effects. It is expressed in T cells  
315 where it has important roles in the regulation of T cell effector functions <sup>7,24,25</sup>. For example, it  
316 activates antigen-specific naïve CD4 T cell responses, and its knockout impairs T cell activation<sup>26</sup>.  
317 Fyn also play a critical role propagating and amplifying T-cell antigen receptor (TCR) signaling<sup>7</sup>.  
318 The search for glioma driver genes has resulted from sequencing and mutation analysis of human  
319 tumors <sup>27</sup>. Important driver genes in glioblastoma are the epidermal growth factor receptor  
320 (EGFR), the platelet derived growth factor receptor (PDGFR), and MET, the receptor for the  
321 hepatocyte growth factor (HGF). Elucidating the transduction pathways involved in malignant  
322 transformation and tumor progression in glioma has not been yet achieved. It is likely that these  
323 genes are not necessarily mutated, as their transduction activity can change due to transcriptional  
324 or post-translational modifications in the absence of mutations. Fyn is mutated in in a very low  
325 percentage (0.1-0.4 %) of human gliomas <sup>28,29</sup>.

326 In this study, we demonstrate the importance of studying comparative functional gene interaction  
327 networks of tumors of different malignity to identify key potential glioblastoma regulating  
328 oncogenic pathways and networks. Our findings from the network analysis of differentially

329 expressed genes of highly malignant versus less malignant glioma stem cells highlighted Fyn as  
330 a highly connected node. This analysis suggested that Fyn is a central hub in the DE network and  
331 a potential major regulator of glioma malignancy.

332 Furthermore, human glioblastoma expression analysis from the Rembrandt, TCGA and  
333 Gravendeel databases <sup>30</sup>, and data from Lu *et al* <sup>12</sup> demonstrate an increased expression of Fyn  
334 in human gliomas. These studies correlate with our results of Fyn expression in mouse and human  
335 glioma stem cells with diverse malignant capacity which show that Fyn is overexpressed in the  
336 more malignant cells.

337 Previous studies of Fyn's role in different cancers <sup>12,13,22,23,31</sup> correlate with our findings, i.e., that  
338 Fyn is involved in cell migration, cell proliferation, PIK3 and EGFR signaling, MAPK cascade  
339 regulation, response to EGFR, MET, PDGF and TGF-beta. Non-autonomous effects of Fyn  
340 expressed by cancer cells on the regulation of immune responses has not yet been described.

341 *In vitro* and *in vivo* studies <sup>12,16-18</sup> using pan Src family kinase inhibitors such as Saracatinib,  
342 Dasatinib or PP2 suggested a role for Fyn in increasing cell proliferation, migration and tumor  
343 growth and invasion in different cancers including gliomas. Our experiments showed that  
344 Saracatinib decreased cell migration but only had a small effect on cell proliferation. These effects  
345 were also positively correlated with glioma cells aggressiveness.

346 The non-specificity of available SFK inhibitors limits the ability to attribute specific effects to  
347 individual kinases <sup>32</sup>. Attempts to discover selective Fyn inhibitors <sup>33</sup>, have so far been  
348 unsuccessful, though there is currently a strong push for industry to find novel Fyn inhibitors,  
349 particularly to treat Alzheimer's Disease. Thus, the genetic inhibition of Fyn remains the best  
350 option to study its functions.

351 *In vitro* studies of Fyn effects on cell proliferation and migration, reported by Kan V. Lu *et al* <sup>12</sup> and  
352 others <sup>12,15,16,34</sup> using siRNA to inhibit Fyn in human glioma cells obtained equivocal findings, with  
353 positive <sup>12,15,34</sup> and also negative results <sup>16</sup>. In our experiments, selective genetic downregulation

354 of Fyn in glioma cells resulted in a significant decrease in the proliferation and migration of murine  
355 and human glioma stem cells.

356 Previous studies *in vivo*, have been inconclusive. Studies reported by Lewis-Tuffin and colleagues  
357 <sup>15</sup> using an implantable glioma model in immune-deficient mice demonstrated inhibitory effects  
358 for the SFK member Lyn, but failed to detect effects of Fyn, or others SFK members. However,  
359 our results indicate that Fyn is a significant regulator of glioma growth and malignancy *in vivo*. We  
360 demonstrated increases in survival and decreased tumor growth using immune-competent mice  
361 implanted with glioma stem cells genetically engineered with shRNA-Fyn, or using GEMMs with  
362 plasmids that encode genes to induce glioma as well as shRNA-Fyn.

363 The genetic analysis indicates that Fyn downregulation in tumor cells activates the anti-tumor  
364 immune response. The GSEA analysis discovered a group of immune related gene ontologies,  
365 such as “Innate immune response”, “Adaptive immune response”, “Response to IFN $\gamma$ ” and  
366 “Leukocyte chemotaxis” as some of the most enriched GO terms in our model, having highly  
367 significant q values. We thus propose a new mechanism by which Fyn knockdown in the glioma  
368 cells induces the activation of the tumor immune response. The central role of the immune system  
369 is supported by implantation of Fyn knockdown glioma cells in NSG immune-deficient mice. In  
370 immune-deficient mice, Fyn knockdown provided a very minor survival benefit, compared to the  
371 one obtained in immune-competent mice after implantation of murine glioma stem cells, or,  
372 following induction of GEMM incorporating shRNA-Fyn.

373 We also detected that the signal transducer and activator of transcription (STAT1) is  
374 overexpressed in Fyn downregulated tumors. In human glioma genomic expression, STAT-1 is  
375 also in opposite correlation with Fyn expression <sup>35,36</sup>. In addition, we verified that STAT-1 protein  
376 is overexpressed in the tumor cells when Fyn is knocked down. Moreover, the network interaction  
377 analysis shows that when Fyn is downregulated STAT1 is a central node with a principal role in  
378 immune system regulation. STAT1 is a cytoplasmic transcription factor activated by cytokines and

379 growth factor receptors<sup>37</sup>. Many others<sup>38-41</sup> have shown that STAT1 triggers pro-apoptotic and  
380 anti-proliferative responses through increasing the anti-tumor immunity in different cancers.  
381 STAT-1 activation and nuclear translocation is activated by IFN $\gamma$ <sup>42</sup>.  
382 IFN $\gamma$  is mainly produced by T cells and NK cells. It can induce a positive feedback in the STAT1  
383 pathway that increases the immune response in the tumor microenvironment<sup>38,41</sup>. STAT-1  
384 triggers the expression and activation of IRF-1, IRF8, NLRC5, CIITA, which induce the expression  
385 of genes that participate in antigen presentation (i.e: TAP1, CXCL9, CCL1, H2-Q4 and H2-DMa,  
386 H2-Aa, H2-Ab1)<sup>39,41,43-45</sup>. These genes, as well as other immune-related genes, were  
387 overexpressed in our RNA-Seq analysis of Fyn knockdown glioma models. The GSEA analysis  
388 confirms that these genes are part of the immune gene ontologies over-represented in our  
389 models. As supported by the genetic and network analysis, we suggest that the effect of Fyn on  
390 glioma survival is due to its modulation of both the anti-glioma immune response as well as the  
391 capacity of tumor cells to respond to immune attack. For example, our data indicate that Fyn  
392 regulates expression MHC Class I and II (H-2 antigens), as well as STAT1 signaling and changes  
393 in IFN $\gamma$  secretion. We conclude that the inhibition of Fyn expression causes an increase in the  
394 anti-tumor immune response. We propose that this effect is responsible for the increased  
395 longevity of animals bearing tumors with knocked down Fyn. Under pathological conditions we  
396 propose that the main roles of Fyn's pro-tumoral activity are the combined effects on reducing  
397 expression of pro-immunogenic genes in tumor cells, and indirectly, by causing an inhibition of  
398 the anti-glioma immune response.  
399 We propose that Fyn inhibition in tumor cells could be a novel therapeutic target in gliomas.  
400 Furthermore, combination of Fyn inhibition with cancer immunotherapy as immune checkpoint  
401 blockade (PDL1-PD1 inhibitors), IFN $\gamma$  treatment, Ad-hCMV-TK and Ad-hCMV-Flt3L treatment  
402<sup>5,42,46</sup> are promising avenues to explore novel treatment for gliomas.

403

404



405 **METHODS**

406 **Glioma cells and culture conditions.** Primary mouse neurospheres glioma cells: Mouse  
407 neurospheres were derived from genetically engineered mouse models (GEMM) of gliomas  
408 generated in our lab using the Sleeping Beauty (SB) transposon system. These methods were  
409 previously described by us in detail in Koschmann et al., 2016, Wiesner *et al*, 2009.<sup>2,47</sup>. Glioma  
410 neurospheres exhibit the activation of the RTK/RAS/PI3K pathway, the knockdown of p53 and  
411 with or without another specific gene modification as described: NP (N-Ras and shp53), NPA (N-  
412 Ras, shp53 and shATRX), and NPAI (N-Ras-shp53-shATRX and mutant IDH<sup>R132H</sup> expression)  
413 <sup>2,20</sup>. Mouse adherent glioma cells: The mouse glioma cell line GL26 was used and maintained as  
414 described in Supplementary Information. Human glioma stem cells: The human glioma derived  
415 stem cell MGG8 was obtained from Samuel Rabkin, Harvard University. All cells were maintained  
416 as described in Supplementary Information.

417  
418 **In vitro cell treatments.** Cells were treated with Saracatinib (AZD0530) a Src family pan inhibitor  
419 (Selleck Chemicals, Houston, TX )<sup>18</sup>. Saracatinib was diluted in absolute ethanol at an initial  
420 concentration of 50 mM. Cells were treated with increasing concentrations of Saracatinib for 48,72  
421 or 96 hours as described for each experiment in detail, above. Treatment was performed to  
422 analyze glioma cell proliferation and migration.

423  
424 **In vitro cell viability assay.** Cell viability was analyzed using the CellTiter-Glo® Luminescent  
425 Assay (Promega Corp. Madison, WI, US) as recommended by the manufacturer. 1000 cells/well  
426 were plated in opaque-walled 96-well plates and cultured in 100 ul of their respective media. Cells  
427 were grown for up to 96 hrs to analyze cell proliferation. For Saracatinib treatment experiments,  
428 cells were treated with increased concentrations of Saracatinib (0.026, 0.06, 0.16, 0.4, 1, 2.5, 6.5,  
429 16 uM) or the corresponding control vehicle (ethanol). After the desired period, cells were lysed  
430 by adding 100 ul of Cell Titer Glo reagent, mixed by pipetting, and incubated for 10 minutes at

431 room temperature. Luminescence was recorded using the Veritas™ Microplate Luminometer  
432 (Turner Biosystems, Inc). Cell viability at day zero was determined as a seeding control and used  
433 for normalization.

434

435 ***In vitro* cell migration assay.** Transwell migration assays were utilized to determine cell  
436 migration *in vitro*. Transwell® polycarbonate membrane inserts (Corning Inc.) of 6.5 mm diameter  
437 and 8 µm pore size were utilized for all assays. A suspension of 50,000 cells in 100 µl of NSC  
438 medium without growth factors was seeded on the top of the Transwell insert. The bottom well  
439 was filled with 600 µl of NSC media. The bottom well was supplemented with 50 nM CLX12 in  
440 assays using attached cells, and 50 nM CLX12 with 20 ng/ml of hFGF and hEGF in assays using  
441 neurosphere derived cells. Saracatinib was added at a concentration of 0.5 µM, 1 µM and 2.5 µM  
442 in the bottom well for all Saracatinib migration experiments. To quantify migrating cells, the  
443 transwell was removed and the top of the membrane was cleaned carefully with a cotton  
444 applicator to remove any remaining cells. All cells that had migrated through the Transwell  
445 membrane were lysed by adding 200 µl of CellTiter-Glo® Luminescent reagent and incubated for  
446 10 minutes at room temperature. A standard curve was set up for each experiment. The  
447 percentage of cells that migrated through the Transwell membrane was determined by  
448 luminescence using the Veritas™ Microplate Luminometer (Turner Biosystems, Inc). The amount  
449 of migrating cells was normalized against the total cells seeded in a control well at the same time.

450

451 **Generation of stable cell lines with Fyn knockdown.** NP and NPA neurospheres were used to  
452 generate stable cell lines with Fyn knockdown. The pLenti pLKO-non-target shRNA control vector  
453 (SHC002) and two different pLenti-mouse shRNA vectors for Fyn were selected from Sigma  
454 Aldrich MISSION® shRNA Vectors. The Fyn shRNA identification numbers are:  
455 TRCN0000023383 (shFyn #1) and TRCN0000361213 (shFyn #2). The Fyn-shRNA lentivirus  
456 generation was performed by the Vector Core of the University of Michigan. Cells were infected

457 with the lentivirus as described previously by us <sup>4</sup>. After 48 hours, cells were selected with  
458 puromycin at a concentration of 0.5 µg/µl. Immunoblotting was used to confirm Fyn knockdown.  
459 Fyn shRNA #1 and #2 cells were used for *in vitro* experiments, and shFyn #2 cells were selected  
460 for *in vivo* experiments.

461  
462 **Intracranial implantable syngeneic mouse glioma model.** All animal studies were conducted  
463 according to the guidelines approved by the Institutional Animal Care and Use Committee  
464 (IACUC) at the University of Michigan. Intracranial surgeries were performed according to the  
465 approved IACUC protocol, PRO00007666 for C57BL/6 immune-competent mice and  
466 PRO00007669 for NSG immune-suppressive mice. Glioblastoma tumors were generated by  
467 intracranial implantation of  $3.0 \times 10^4$  neurosphere cells into the striatum of mouse brains.  
468 Neurosphere cells were originated from the Sleeping beauty model<sup>2,48</sup>. Detailed methodology is  
469 described in Supplementary Information.

470  
471 **Genetically engineered mouse glioma model (GEMM) generation for Fyn Knockdown.** The  
472 animal model study was conducted in C57BL/6 strain (Jackson Laboratory, Bar Harbor ME,  
473 000664). according to guidelines approved by the Institutional Animal Care and Use Committee  
474 at the University of Michigan and the approved IACUC protocol PRO00007617.

475 A Fyn knockdown glioma murine model and the appropriate comparisons/controls were created  
476 by the Sleeping Beauty (SB) transposon system. This system is used to integrate genetic lesions  
477 into the genomic DNA of neonatal mice. Female and male postnatal day 1 (P01) wild-type  
478 C57BL/6 mice were used in all experiments <sup>2</sup>. The genotype of SB generated tumors involved  
479 these combinations: (i) shp53 and NRAS (**NP**), (ii) shp53, NRAS and shFyn (**NPF**), (iii) shp53,  
480 NRAS and shATRX (**NPA**), (iv) shp53, NRAS, shATRX and shFyn (**NPAF**), (v) shp53, NRAS and  
481 PDGFβ (**NPD**), (vi) shp53, NRAS, PDGFβ and shFyn (**NPDF**). Mice were injected according to a  
482 protocol previously described by our lab <sup>20</sup>. Tumors then develop intracranially *de novo* from

483 neural progenitor cells. To design and cloning of the shRNA targeting the FYN gene (pT2-shFyn-  
484 GFP4), we tested two 22 base pair sequences in a 97 base pair hairpin sequence for the mouse  
485 Fyn gene (shFyn-(1): HP\_106460 and shFyn-(2): HP\_292369) selected from candidate  
486 sequences within the RNAi codex database (<http://cancan.cshl.edu/cgi-bin/Codex/Codex.cgi>).

487

488 **Immunoblotting.** Glioma cells ( $1.0 \times 10^6$  cells) were seeded in a 100 mm dish and grown for  
489 various times according to each experimental design. Detailed protocol is shown in  
490 supplementary information.

491

492 **Immunohistochemistry of paraffin embedded brains (IHC-DAB).** Immunohistochemistry  
493 assay was performed in 4% paraformaldehyde fixed and paraffin embedded tissue in section of  
494  $5\mu\text{m}$  as described previously by our laboratory <sup>49</sup>. Immunohistochemistry protocol was modified  
495 from a protocol used in our laboratory <sup>20</sup> as described in Supplementary Information.

496

497 **Immunofluorescence of paraffin embedded brains.** Brains fixed in 4% paraformaldehyde were  
498 then processed and embedded in paraffin and sectioned as described previously by our  
499 laboratory <sup>49</sup>. Fyn antibody was then detected with Alexa Fluor™ 488 Tyramide SuperBoost™ Kit  
500 - Goat anti-Rabbit IgG (Cat. No. B40922) Tyramide SuperBoost™ following the manufacture  
501 instructions (Invitrogen- Thermo Fisher Scientific).

502

503 **RNA isolation and RNA-Sequencing.** Three tumors of each experimental group NP vs. NPF  
504 were studied by RNA-Seq analysis. RNA was isolated using the RNeasy Plus Mini Kit (©  
505 QIAGEN) following the manufacture instructions. RNA-sequencing was performed at the  
506 University of Michigan DNA Sequencing Core.

507 RNA-Seq libraries were constructed with the TruSeq Stranded Total RNA Library Prep kit  
508 (Illumina, San Diego, CA) and validated for control by TapeStation and qPCR using Kapa's library  
509 quantification kit for Illumina Sequencing platforms (Kapa Biosystems, Wilmington MA).

510 The samples were pooled, clustered on an Illumina cBot and sequenced on the Illumina  
511 HiSeq 4000, as paired-end 50 nt reads, according to manufacturer's recommended protocols.  
512 Detailed protocol is described in Supplementary information.

513

514 **RNA-Sequencing data analysis.** Tuxedo Suite software package was used for alignment,  
515 differential expression analysis, and post-analysis diagnostics<sup>50-52</sup> by the University of Michigan  
516 Bioinformatics Core as described in detail in SI Appendix.. Volcano plots analysis for DE genes  
517 were produced with the R base package in our lab. Differentially expressed genes of NPF versus  
518 NP tumors were used for Gene set enrichment analysis (GSEA). Network analysis was performed  
519 using Cytoscape and Reactome App to analyze the interaction of the differentially expressed  
520 genes. Detailed bioinformatics analysis is described in Supplementary Information.

521

522 **Statistical Analysis.** All *in vivo* experiments were performed in at least three or more  
523 independent biological replicates, depending on the specific analysis. Data is presented as the  
524 mean  $\pm$  SEM. The difference was considered statistically significant when  $p < 0.05$  using the  
525 ANOVA test to compare two or more samples. In experiments that included one variable, the one-  
526 way ANOVA test was used. In experiments with two independent variables, the two-way ANOVA  
527 test was employed. A posterior Tukey's multiple comparisons test was used for mean  
528 comparisons. Student t-test was used to compare unpaired data from two samples. Survival data  
529 were entered into Kaplan-Meier survival curves plots, and statistical analysis was performed using  
530 the Mantel log-rank test. The effect size is expressed in median survival (MS). Linear mixed  
531 effects models were used to compare Fyn levels between tumor groups determined by  
532 immunofluorescence imaging. Linear mixed effects models were also used to compare the P-H3-

533 S10 quantification by immunohistochemistry in tumor groups. This model considers that multiple  
534 observations per animal are correlated through a random effect. Significance was determined if  
535  $p < 0.05$ . All analyses were conducted using GraphPad Prism (version 6.01), SAS (version 9.4,  
536 SAS Institute, Cary, NC) or Infostat (Version 2014, National University of Cordoba, Argentina).  
537 The statistical tests used are indicated within the figure legends.

538

539

540

541 **References**

- 542 1 Reifenger, G., Wirsching, H. G., Knobbe-Thomsen, C. B. & Weller, M. Advances in the  
543 molecular genetics of gliomas - implications for classification and therapy. *Nature reviews.*  
544 *Clinical oncology* **14**, 434-452, doi:10.1038/nrclinonc.2016.204 (2017).
- 545 2 Koschmann, C. *et al.* ATRX loss promotes tumor growth and impairs nonhomologous end  
546 joining DNA repair in glioma. *Sci Transl Med* **8**, 328ra328,  
547 doi:10.1126/scitranslmed.aac8228 (2016).
- 548 3 Frattini, V. *et al.* The integrated landscape of driver genomic alterations in glioblastoma.  
549 *Nature genetics* **45**, 1141-1149, doi:10.1038/ng.2734 (2013).
- 550 4 Preusser, M., Lim, M., Hafler, D. A., Reardon, D. A. & Sampson, J. H. Prospects of  
551 immune checkpoint modulators in the treatment of glioblastoma. *Nature reviews.*  
552 *Neurology* **11**, 504-514, doi:10.1038/nrneurol.2015.139 (2015).
- 553 5 Ratnam, N. M., Gilbert, M. R. & Giles, A. J. Immunotherapy in CNS cancers: the role of  
554 immune cell trafficking. *Neuro-oncology* **21**, 37-46, doi:10.1093/neuonc/ny084 (2019).
- 555 6 Thomas, S. M. & Brugge, J. S. Cellular functions regulated by Src family kinases. *Annual*  
556 *review of cell and developmental biology* **13**, 513-609,  
557 doi:10.1146/annurev.cellbio.13.1.513 (1997).
- 558 7 Palacios, E. H. & Weiss, A. Function of the Src-family kinases, Lck and Fyn, in T-cell  
559 development and activation. *Oncogene* **23**, 7990-8000, doi:10.1038/sj.onc.1208074  
560 (2004).
- 561 8 Senis, Y. A., Mazharian, A. & Mori, J. Src family kinases: at the forefront of platelet  
562 activation. *Blood* **124**, 2013-2024, doi:10.1182/blood-2014-01-453134 (2014).
- 563 9 Zhang, S. *et al.* Suppression of protein tyrosine phosphatase N23 predisposes to breast  
564 tumorigenesis via activation of FYN kinase. *Genes Dev* **31**, 1939-1957,  
565 doi:10.1101/gad.304261.117 (2017).
- 566 10 Maksumova, L. *et al.* Protein tyrosine phosphatase alpha regulates Fyn activity and  
567 Cbp/PAG phosphorylation in thymocyte lipid rafts. *J Immunol* **175**, 7947-7956 (2005).
- 568 11 Yamauchi, J. *et al.* Phosphorylation of cytohesin-1 by Fyn is required for initiation of  
569 myelination and the extent of myelination during development. *Science signaling* **5**, ra69,  
570 doi:10.1126/scisignal.2002802 (2012).
- 571 12 Lu, K. V. *et al.* Fyn and SRC are effectors of oncogenic epidermal growth factor receptor  
572 signaling in glioblastoma patients. *Cancer research* **69**, 6889-6898, doi:10.1158/0008-  
573 5472.can-09-0347 (2009).

- 574 13 Yadav, V. & Denning, M. F. Fyn is induced by Ras/PI3K/Akt signaling and is required for  
575 enhanced invasion/migration. *Molecular carcinogenesis* **50**, 346-352,  
576 doi:10.1002/mc.20716 (2011).
- 577 14 Jensen, A. R. *et al.* Fyn is downstream of the HGF/MET signaling axis and affects cellular  
578 shape and tropism in PC3 cells. *Clinical cancer research : an official journal of the*  
579 *American Association for Cancer Research* **17**, 3112-3122, doi:10.1158/1078-0432.ccr-  
580 10-1264 (2011).
- 581 15 Lewis-Tuffin, L. J. *et al.* Src family kinases differentially influence glioma growth and  
582 motility. *Mol Oncol* **9**, 1783-1798, doi:10.1016/j.molonc.2015.06.001 (2015).
- 583 16 Han, X. *et al.* The role of Src family kinases in growth and migration of glioma stem cells.  
584 *Int J Oncol* **45**, 302-310, doi:10.3892/ijo.2014.2432 (2014).
- 585 17 Yamaguchi, H. *et al.* Saracatinib impairs the peritoneal dissemination of diffuse-type  
586 gastric carcinoma cells resistant to Met and fibroblast growth factor receptor inhibitors.  
587 *Cancer Sci* **105**, 528-536, doi:10.1111/cas.12387 (2014).
- 588 18 Liu, K. J. *et al.* Saracatinib (AZD0530) is a potent modulator of ABCB1-mediated multidrug  
589 resistance in vitro and in vivo. *Int J Cancer* **132**, 224-235, doi:10.1002/ijc.27649 (2013).
- 590 19 Cavalloni, G. *et al.* Antitumor activity of Src inhibitor saracatinib (AZD-0530) in preclinical  
591 models of biliary tract carcinomas. *Mol Cancer Ther* **11**, 1528-1538, doi:10.1158/1535-  
592 7163.mct-11-1020 (2012).
- 593 20 Núñez, F. J. *et al.* IDH1-R132H acts as a tumor suppressor in glioma via epigenetic up-  
594 regulation of the DNA damage response. **11**, eaaq1427,  
595 doi:10.1126/scitranslmed.aaq1427 %J Science Translational Medicine (2019).
- 596 21 Wilson, T. J., Zamler, D. B., Doherty, R., Castro, M. G. & Lowenstein, P. R. Reversibility  
597 of glioma stem cells' phenotypes explains their complex in vitro and in vivo behavior:  
598 Discovery of a novel neurosphere-specific enzyme, cGMP-dependent protein kinase 1,  
599 using the genomic landscape of human glioma stem cells as a discovery tool. *Oncotarget*  
600 **7**, 63020-63041, doi:10.18632/oncotarget.11589 (2016).
- 601 22 Elias, D. & Ditzel, H. J. Fyn is an important molecule in cancer pathogenesis and drug  
602 resistance. *Pharmacol Res* **100**, 250-254, doi:10.1016/j.phrs.2015.08.010 (2015).
- 603 23 Zheng, J., Li, H., Xu, D. & Zhu, H. Upregulation of Tyrosine Kinase FYN in Human Thyroid  
604 Carcinoma: Role in Modulating Tumor Cell Proliferation, Invasion, and Migration. *Cancer*  
605 *Biother Radiopharm* **32**, 320-326, doi:10.1089/cbr.2017.2218 (2017).
- 606 24 Vivier, E., Nunes, J. A. & Vely, F. Natural killer cell signaling pathways. *Science (New*  
607 *York, N.Y.)* **306**, 1517-1519, doi:10.1126/science.1103478 (2004).



- 608 25 Abram, C. L. & Lowell, C. A. The diverse functions of Src family kinases in macrophages.  
609 *Frontiers in bioscience : a journal and virtual library* **13**, 4426-4450 (2008).
- 610 26 Sugie, K., Jeon, M. S. & Grey, H. M. Activation of naive CD4 T cells by anti-CD3 reveals  
611 an important role for Fyn in Lck-mediated signaling. *Proceedings of the National Academy*  
612 *of Sciences of the United States of America* **101**, 14859-14864,  
613 doi:10.1073/pnas.0406168101 (2004).
- 614 27 Comprehensive genomic characterization defines human glioblastoma genes and core  
615 pathways. *Nature* **455**, 1061-1068, doi:10.1038/nature07385 (2008).
- 616 28 Brennan, C. W. *et al.* The somatic genomic landscape of glioblastoma. *Cell* **155**, 462-477,  
617 doi:10.1016/j.cell.2013.09.034 (2013).
- 618 29 Ceccarelli, M. *et al.* Molecular Profiling Reveals Biologically Discrete Subsets and  
619 Pathways of Progression in Diffuse Glioma. *Cell* **164**, 550-563,  
620 doi:10.1016/j.cell.2015.12.028 (2016).
- 621 30 Bowman, R. L., Wang, Q., Carro, A., Verhaak, R. G. & Squatrito, M. GlioVis data portal  
622 for visualization and analysis of brain tumor expression datasets. *Neuro-oncology* **19**, 139-  
623 141, doi:10.1093/neuonc/now247 (2017).
- 624 31 Saito, Y. D., Jensen, A. R., Salgia, R. & Posadas, E. M. Fyn: a novel molecular target in  
625 cancer. *Cancer* **116**, 1629-1637, doi:10.1002/cncr.24879 (2010).
- 626 32 Schenone, S. *et al.* Fyn kinase in brain diseases and cancer: the search for inhibitors.  
627 *Current medicinal chemistry* **18**, 2921-2942 (2011).
- 628 33 Jelic, D. *et al.* Homology modeling of human Fyn kinase structure: discovery of rosmarinic  
629 acid as a new Fyn kinase inhibitor and in silico study of its possible binding modes. *Journal*  
630 *of medicinal chemistry* **50**, 1090-1100, doi:10.1021/jm0607202 (2007).
- 631 34 Zhang, S. *et al.* Fyn-phosphorylated PIKE-A binds and inhibits AMPK signaling, blocking  
632 its tumor suppressive activity. *Cell Death Differ* **23**, 52-63, doi:10.1038/cdd.2015.66  
633 (2016).
- 634 35 Gao, J. *et al.* Integrative analysis of complex cancer genomics and clinical profiles using  
635 the cBioPortal. *Science signaling* **6**, pl1, doi:10.1126/scisignal.2004088 (2013).
- 636 36 Cerami, E. *et al.* The cBio cancer genomics portal: an open platform for exploring  
637 multidimensional cancer genomics data. *Cancer discovery* **2**, 401-404, doi:10.1158/2159-  
638 8290.Cd-12-0095 (2012).
- 639 37 Schindler, C., Shuai, K., Prezioso, V. R. & Darnell, J. E., Jr. Interferon-dependent tyrosine  
640 phosphorylation of a latent cytoplasmic transcription factor. *Science (New York, N. Y.)* **257**,  
641 809-813 (1992).

- 642 38 Au-Yeung, N., Mandhana, R. & Horvath, C. M. Transcriptional regulation by STAT1 and  
643 STAT2 in the interferon JAK-STAT pathway. *Jak-stat* **2**, e23931, doi:10.4161/jkst.23931  
644 (2013).
- 645 39 Avalle, L., Pensa, S., Regis, G., Novelli, F. & Poli, V. STAT1 and STAT3 in tumorigenesis:  
646 A matter of balance. *Jak-stat* **1**, 65-72, doi:10.4161/jkst.20045 (2012).
- 647 40 Kim, H. S. & Lee, M. S. STAT1 as a key modulator of cell death. *Cellular signalling* **19**,  
648 454-465, doi:10.1016/j.cellsig.2006.09.003 (2007).
- 649 41 Majoros, A. *et al.* Canonical and Non-Canonical Aspects of JAK-STAT Signaling: Lessons  
650 from Interferons for Cytokine Responses. *Frontiers in immunology* **8**, 29,  
651 doi:10.3389/fimmu.2017.00029 (2017).
- 652 42 Ivashkiv, L. B. IFN $\gamma$ : signalling, epigenetics and roles in immunity, metabolism,  
653 disease and cancer immunotherapy. *Nature reviews. Immunology* **18**, 545-558,  
654 doi:10.1038/s41577-018-0029-z (2018).
- 655 43 Simpson, J. A. *et al.* Intratumoral T cell infiltration, MHC class I and STAT1 as biomarkers  
656 of good prognosis in colorectal cancer. *Gut* **59**, 926-933, doi:10.1136/gut.2009.194472  
657 (2010).
- 658 44 Leibowitz, M. S., Andrade Filho, P. A., Ferrone, S. & Ferris, R. L. Deficiency of activated  
659 STAT1 in head and neck cancer cells mediates TAP1-dependent escape from cytotoxic T  
660 lymphocytes. *Cancer immunology, immunotherapy : CII* **60**, 525-535,  
661 doi:10.1007/s00262-010-0961-7 (2011).
- 662 45 Qiu, L. *et al.* Expression patterns of NLRC5 and key genes in the STAT1 pathway following  
663 infection with *Salmonella pullorum*. *Gene* **597**, 23-29, doi:10.1016/j.gene.2016.10.026  
664 (2017).
- 665 46 Kamran, N. *et al.* Current state and future prospects of immunotherapy for glioma.  
666 *Immunotherapy* **10**, 317-339, doi:10.2217/imt-2017-0122 (2018).
- 667 47 Wiesner, S. M. *et al.* De novo induction of genetically engineered brain tumors in mice  
668 using plasmid DNA. *Cancer research* **69**, 431-439, doi:10.1158/0008-5472.Can-08-1800  
669 (2009).
- 670 48 Calinescu, A. A. *et al.* Transposon mediated integration of plasmid DNA into the  
671 subventricular zone of neonatal mice to generate novel models of glioblastoma. *Journal*  
672 *of visualized experiments : JoVE*, doi:10.3791/52443 (2015).
- 673 49 Calinescu, A. A. *et al.* Survival and Proliferation of Neural Progenitor-Derived  
674 Glioblastomas Under Hypoxic Stress is Controlled by a CXCL12/CXCR4 Autocrine-  
675 Positive Feedback Mechanism. *Clinical cancer research : an official journal of the*

676 *American Association for Cancer Research* **23**, 1250-1262, doi:10.1158/1078-0432.Ccr-  
677 15-2888 (2017).

678 50 Langmead, B., Trapnell, C., Pop, M. & Salzberg, S. L. Ultrafast and memory-efficient  
679 alignment of short DNA sequences to the human genome. *Genome biology* **10**, R25,  
680 doi:10.1186/gb-2009-10-3-r25 (2009).

681 51 Trapnell, C. *et al.* Differential analysis of gene regulation at transcript resolution with RNA-  
682 seq. *Nature biotechnology* **31**, 46-53, doi:10.1038/nbt.2450 (2013).

683 52 Trapnell, C., Pachter, L. & Salzberg, S. L. TopHat: discovering splice junctions with RNA-  
684 Seq. *Bioinformatics (Oxford, England)* **25**, 1105-1111, doi:10.1093/bioinformatics/btp120  
685 (2009).

686

687

688

689

690

691

692

693

694

695

696

697

698

699

700

701

702

703

704

705 **Acknowledgments**

706 Work was supported by NIH/NINDS Grants: R37-NS094804, R01-NS105556 to M.G.C.;  
707 NIH/NINDS Grants R01-NS076991, and R01-NS096756 to P.R.L.; NIH/NIBIB: R01-EB022563;  
708 NIH/NCI U01CA224160; the Department of Neurosurgery and Leah's Happy Hearts to M.G.C.  
709 and P.R.L. A.C. was funded in part by University of Michigan, MICHR Postdoctoral Translational  
710 Scholars Program, TL1 TR002240-02, Project F049768.

711

712

713 **Author contributions**

714 A.C and PRL conducted and designed the study. A.C and PRL prepared the manuscript with  
715 support of the following authors M.G.C, P.J.D and PK. A.C, P.J.D, A.E.A, P.K, M.V, D.B.Z, P.P,  
716 F.J.N performed the experiments and acquired the data. A.C, P.J.D and M.V analyzed and  
717 interpreted the data. L.Z performed the statistical analysis. P.R.L. and M.G.C. directed the  
718 research and generated the funding. All authors read and edited the manuscript.

719

720

721 **Competing interests**

722 All authors of this paper declare no competing interests.

**Fig. 1**

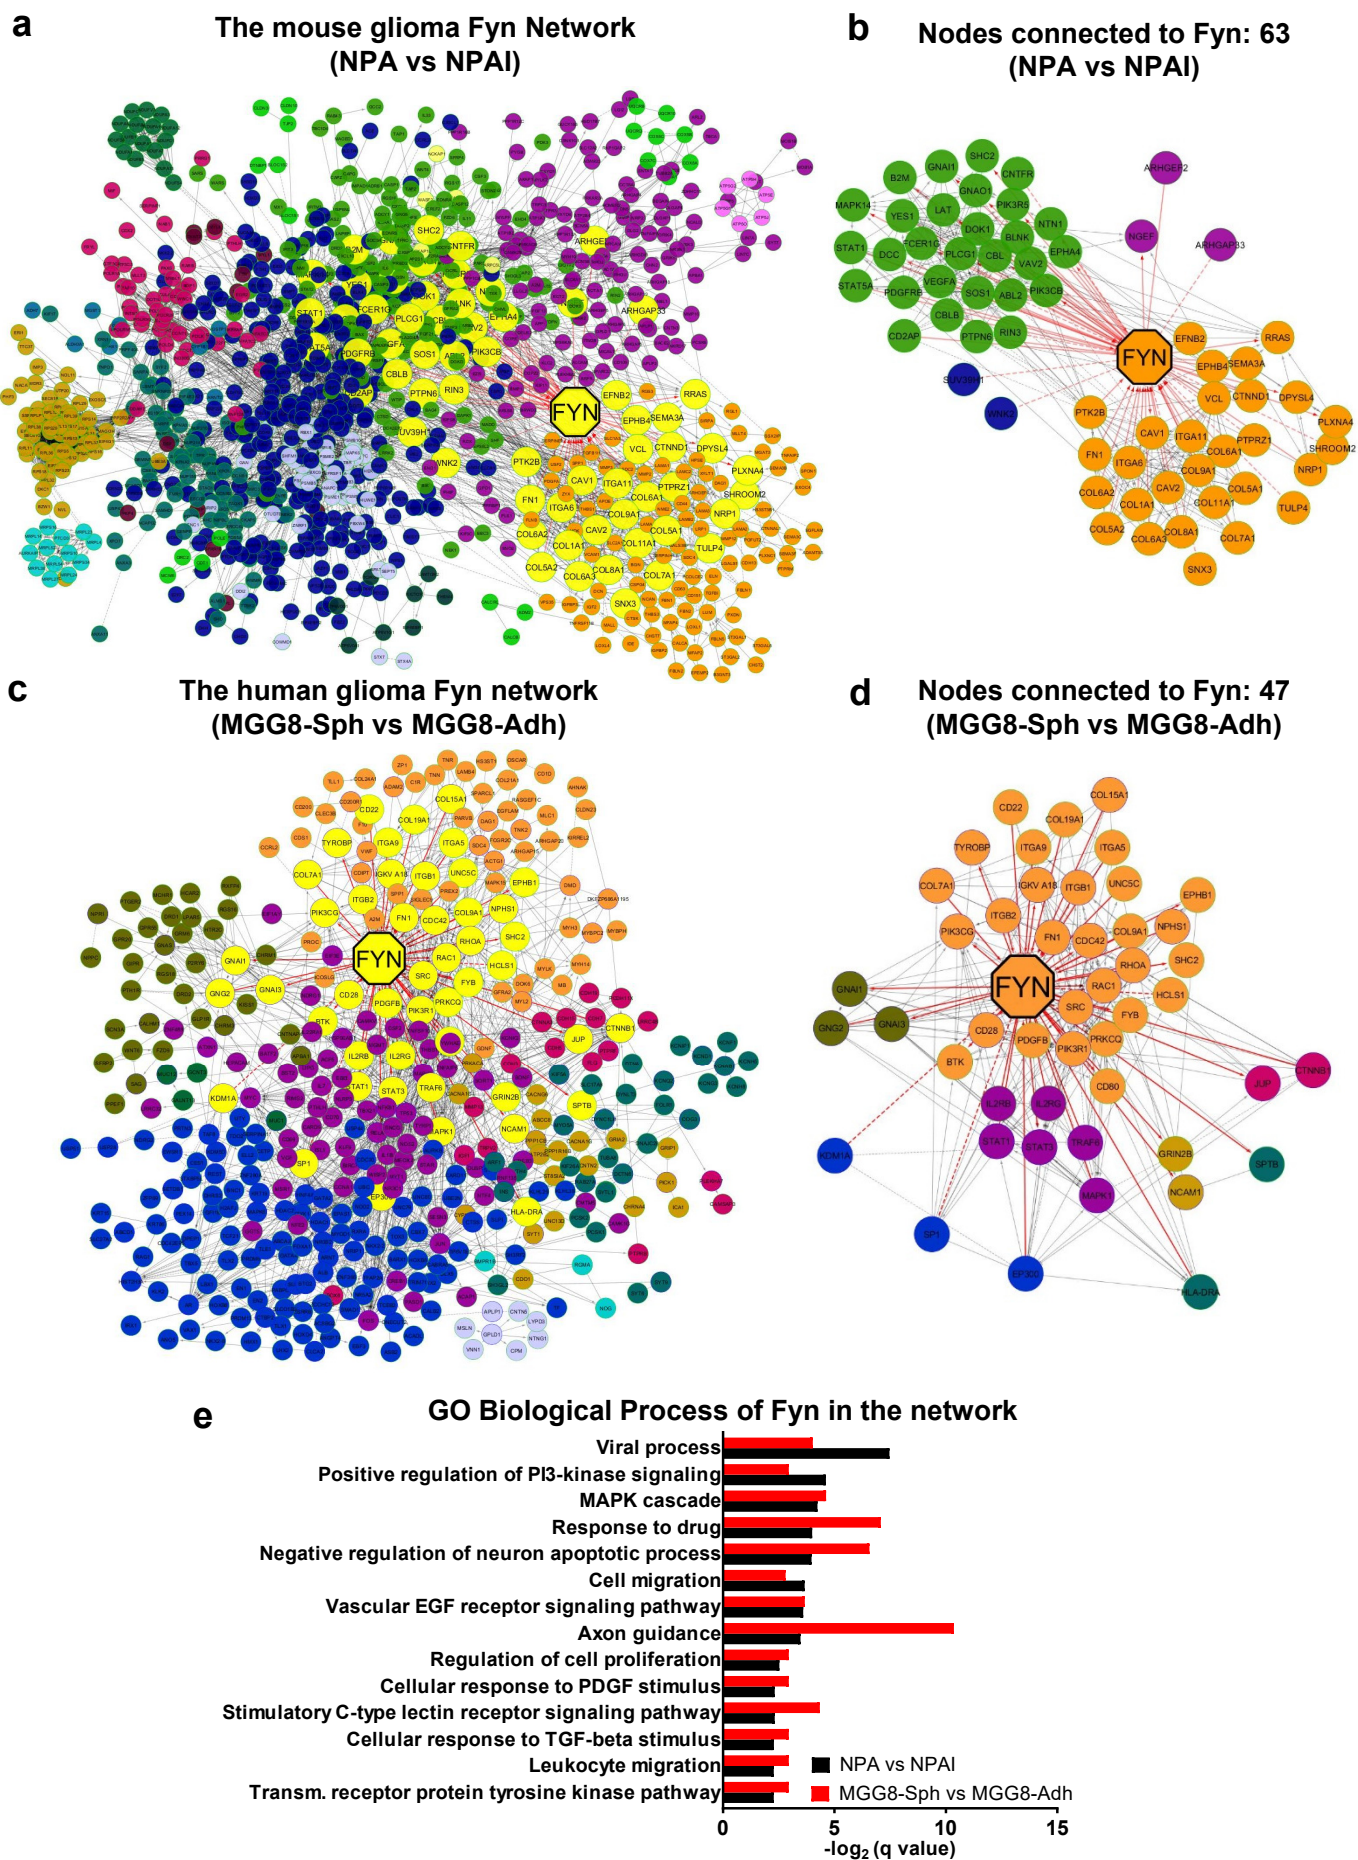

**Fig. 1: Differential gene expression and network analysis identified Fyn as a key regulator of aggressiveness in rodent and human glioma stem cells.**

**a)** Network maps of genes differentially expressed in either malignant NPA glioma stem cells, or in less malignant NPAI mouse glioma stem cells. Image displays entire network. Fyn protein kinase is shown as larger yellow octagonal node. Network was analyzed by the Reactome Functional Interaction (FI) application from Cytoscape. Cluster of nodes shown in the same color illustrate a module of highly interacting genes in the network, which also share functional characteristics. The Fyn subnetwork is highlighted in yellow. **b)** Right panel illustrates a higher magnification of the isolated mouse Fyn subnetwork. Fyn and its first neighbors are shown; red lines indicate the edges connecting nodes. Fyn is a highly connected node with a degree of 63 interactions in the network (4<sup>th</sup> most connected node). The GO corresponding to this network are detailed in Supplementary Table 1a. Note GO related to growth factor and intracellular signaling. **c)** Network analysis of differentially expressed genes of more malignant MGG8-Spheres vs the less malignant MGG8-Adherent human glioma stem cells. Image displays entire network, where Fyn protein kinase is depicted as a larger octagonal node. **d)** This panel illustrates the isolated human Fyn subnetwork. Fyn and its first neighbors are shown; red lines indicate edges connecting nodes. Fyn tyrosine kinase is a highly connected node with a degree of 47 interactions in the network (7<sup>th</sup> most connected node). The GO corresponding to this network are detailed in Supplementary Table 1c. Note GO related to growth factor and intracellular signaling. **e)** Functional enrichment analysis of the gene ontology (GO) terms of the network obtained from Figures 1a and 1b. The bar graph displays overrepresented GO Biological process that include Fyn tyrosine kinase. Groups represented are NPA vs NPAI (black bars) and MGG8-Spheres vs MGG8-Adherent cells (red bars). GO term significance was determined by a cutoff of q-value (FDR) < 0.2. GO terms were plotted against the -Log<sub>2</sub> of the q-value (FDR). Lower panels show the FI sub-network based on a set of genes that directly interact with Fyn inside its module.

**Fig. 2**

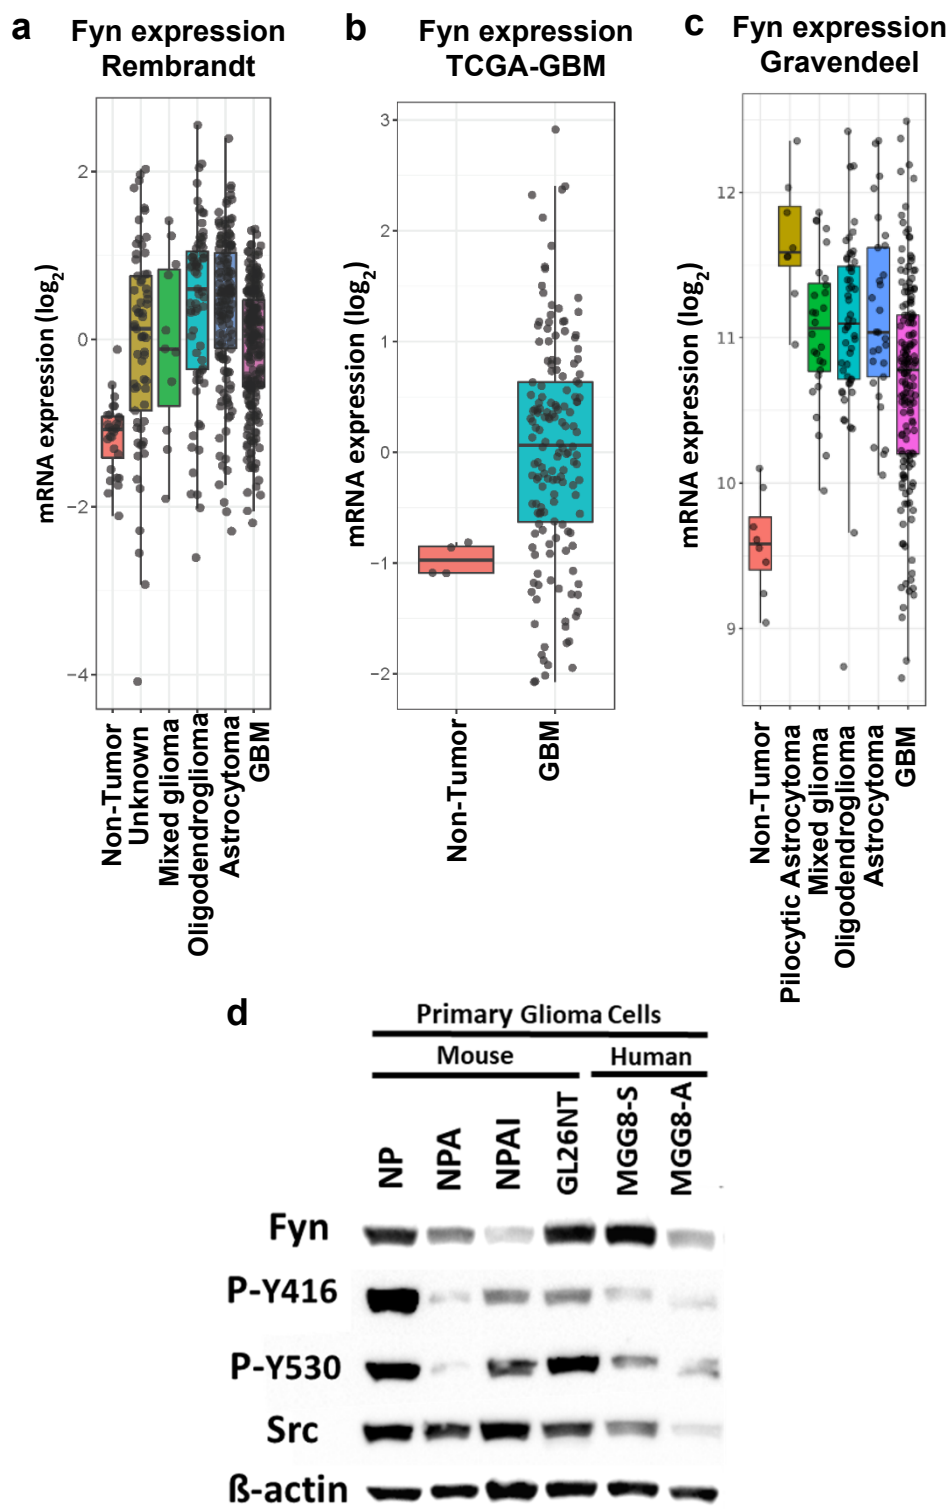

**Fig. 2: Gene expression analysis of Fyn in human glioma tumors and mouse and human glioma cells shows a correlation with aggressiveness**

**a-b-c)** mRNA expression analysis of Fyn in normal brain tissue vs different glioma subtype tissue from Rembrandt, TCGA and Gravendeel database. The data was obtained from the Gliovis (<http://gliovis.bioinfo.cnio.es>) database. **a)** Rembrandt dataset: mRNA expression of Fyn in non-tumor brain tissue vs glioma subtypes (Unknown, Mixed glioma, Oligodendroglioma, Astrocytoma and Glioblastoma). Graph shows the  $\log_2$  mRNA expression levels of Fyn. Statistical significance was given within the corresponding databases (pairwise t-test with Bonferroni correction). Non Tumor-Unknown p-value=  $1 \times 10^{-6}$ ; Non Tumor-Mixed glioma p-value=  $8 \times 10^{-3}$ ; Non Tumor-Oligodendroglioma p-value=  $1 \times 10^{-12}$ ; Non Tumor-Astrocytoma p-value=  $5 \times 10^{-15}$ ; Non Tumor-GBM p-value=  $4.3 \times 10^{-8}$ . **b)** TCGA data: Graph shows the  $\text{Log}_2$  mRNA expression levels of Fyn. Statistical significance was determined using the Pairwise t-test. p-value was determined by Bonferroni correction. Non Tumor-GBM p-value=  $5.1 \times 10^{-2}$ . **c)** Gravendeel database: Non Tumor-Pilocytic Astrocytoma p-value=  $2.7 \times 10^{-8}$ ; Non Tumor-Mixed glioma p-value=  $1.2 \times 10^{-6}$ ; Non Tumor-Oligodendroglioma p-value=  $1.2 \times 10^{-7}$ ; Non Tumor-Astrocytoma p-value=  $2.1 \times 10^{-7}$ ; Non Tumor-GBM p-value=  $1.1 \times 10^{-4}$ . **d)** Western blot (WB) analysis comparing Fyn levels in mouse (GL26, NP, NPA, NPAl) and human (MGG8-Sphere and MGG8-Adherent) glioma cells. WB also shows the expression levels of Src, P-Tyrosine-416 (phosphorylated form of the Src family kinase members at Tyr-416) and P-Tyrosine-530 (phosphorylated form of the Src family kinase members at Tyr-530).  $\beta$ -actin was used as loading control. Western Blot analysis demonstrates that Fyn levels positively correlate with glioma cell malignancy.



**Fig. 3**

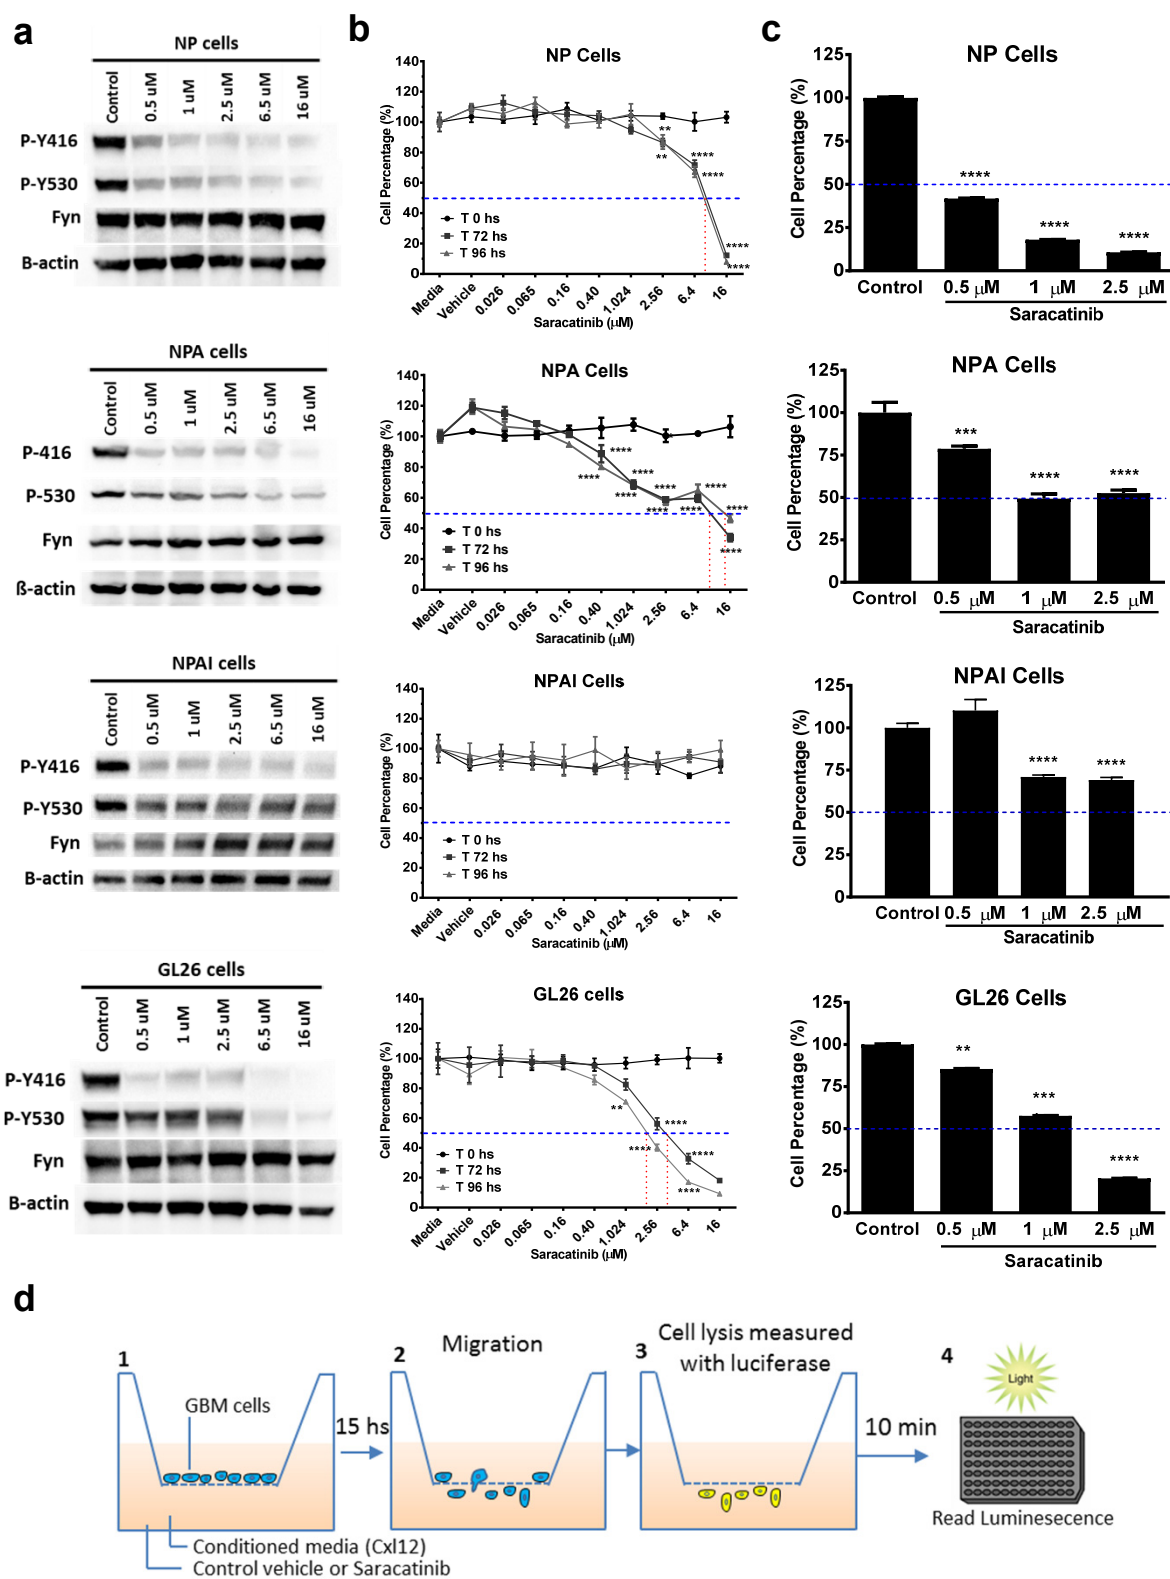

**Fig. 3: Inhibition of Src family kinase activity by Saracatinib treatment decreases cell viability and migration of malignant glioma cells.**

**a)** Western Blot (WB) analysis for P-Tyrosine-416, P-Tyrosine-530, Fyn and Src proteins was performed in mouse glioma cells (NP, NPA, NPAI and GL26) after 48 hours of treatment with the indicated doses of Saracatinib.  $\beta$ -actin was used as loading control. **b)** Cell viability assay performed on mouse glioma cells (NP, NPA, NPAI and GL26) in response to Saracatinib at the indicated doses. Cell viability was evaluated by CellTiterGlo assay performed at 0 hours, 72 hours and 96 hours post Saracatinib treatment. The results are expressed in percent cell viability relative to control, and the statistical significance was determined using two-way ANOVA test. \* $p < 0.05$ , \*\* $p < 0.01$ , \*\*\* $p < 0.001$ , \*\*\*\* $p < 0.0001$ . Error bars represent  $\pm$ SEM. Experiment was performed 3 times with three replicates per treatment condition. Treatment with media alone and media plus ethanol drug vehicle were used as controls. **c)** Transwell Cell Migration assay was performed on mouse glioma cells (NP, NPA, NPAI and GL26) after 15 hours of treatment with Saracatinib at the indicated doses. Data is expressed as percentage of migrating cells relative to the control (ethanol vehicle). Error bars represent  $\pm$ SEM. Experiment was performed 3 times with three replicates per treatment. Statistical significance was determined using One-way ANOVA test. \*\*\* $p < 0.001$ , \*\*\*\* $p < 0.0001$ . **d)** Schematic representation of the Transwell migration assay. GBM cells (blue) were seeded on the top of the Transwell and incubated for 15 hours in conditioned media with Cx12 50 nM. The migrated cells were analyzed using CellTiter-Glo® to measure the viable cells.

**Fig. 4**

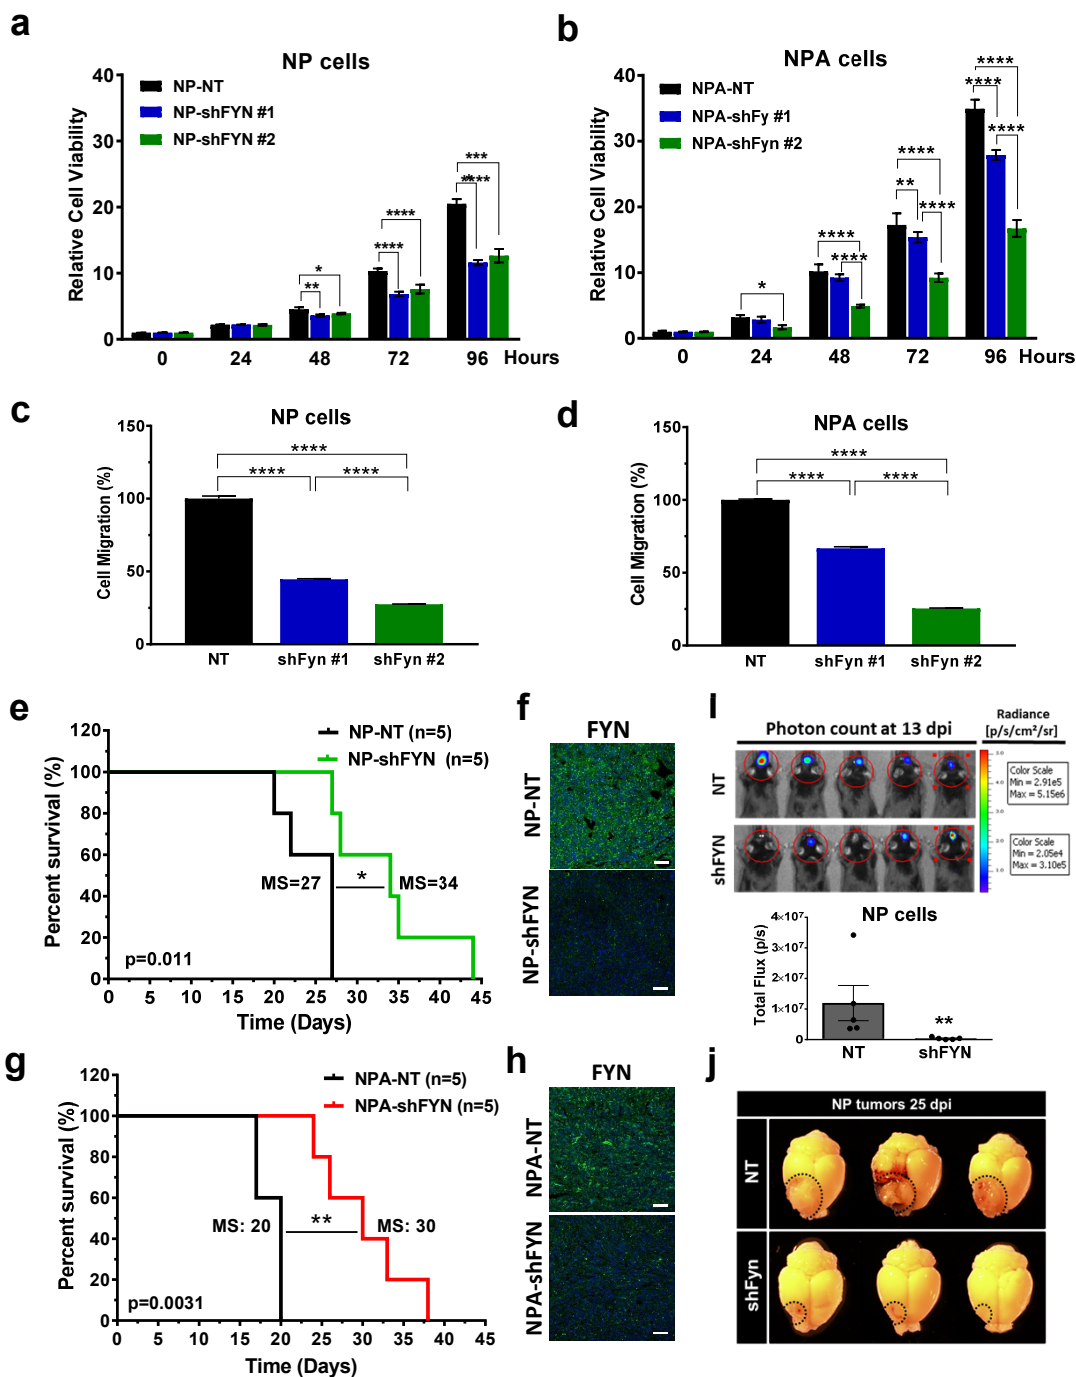

**Fig. 4: Downregulation of Fyn reduces *in vitro* glioma stem cell proliferation and migration, and, *in vivo* increases median survival and reduces tumor growth.**

**a, b)** Cell viability analysis in NP (**a**) and NPA (**b**) cells. Fyn downregulation reduced cell proliferation compared to control cells. Experiments were performed in triplicate. Two-way ANOVA test. \* $p < 0.05$ ; \*\* $p < 0.01$ ; \*\*\* $p < 0.001$ , \*\*\*\* $p < 0.0001$ . Error bars represent  $\pm$ SEM. **c, d)** Cell migration analysis for NP (**c**) and NPA (**d**) cells. Fyn downregulation decreased cell migration compared to control cells. Three independent experiments were performed. One-way ANOVA test. \*\*\*\* $p < 0.0001$  Error bars represent  $\pm$ SEM. **e)** Kaplan–Meier survival curve of glioma generated by intracranial implantation. Mice bearing gliomas with Fyn knockdown displayed significant increases in median survival (MS). Five animals ( $n=5$ ) were used per experimental condition. Log-rank (Mantel-Cox) test (\* $p=0.011$ ). **f)** Fyn expression was detected by immunofluorescence (Alexa 488). Nuclei are labeled by DAPI; representative confocal images (20x, 1240 x 1240 pixels); scale bar: 50  $\mu$ m. shFyn tumors showed decreased expression of Fyn compared to controls, in accordance with WB expression levels of the implanted cells. **g)** Kaplan–Meier survival curves. Mice bearing gliomas with Fyn knockdown displayed significant increase in MS compared to the control. Five animals ( $n=5$ ) were used per experimental condition. Log-rank (Mantel-Cox) test (\*\* $p=0.0031$ ). **h)** Fyn expression was detected by immunofluorescence (Alexa 488). Nuclei are labeled by DAPI. Representative confocal images (20x, 1240 x 1240 pixels). Scale bar: 50  $\mu$ m. shFyn tumors showed decreased expression of Fyn compared to controls; in accordance with WB expression levels of the implanted cells. **i)** Animals harboring shFyn tumors showed a significant decrease in bioluminescence signal at 13 days post implantation (dpi). Luminescence intensity was measured using photons/s/cm<sup>2</sup>/sr and total flux (photon/s). Bar graph represents the luminescence intensity as (photon/s) in five ( $n=5$ ) animals per group. Error bars represent  $\pm$ SEM. Statistical significance was determined using a t-test. \*\* $p < 0.01$ . **j)** Representative picture of the tumor size seen from the brain's surface analyzed at 25 dpi of animals harboring NP-NT vs NP-shFyn tumors. Tumors with Fyn downregulation displayed decreased tumor compared to the control.

## Fig. 5

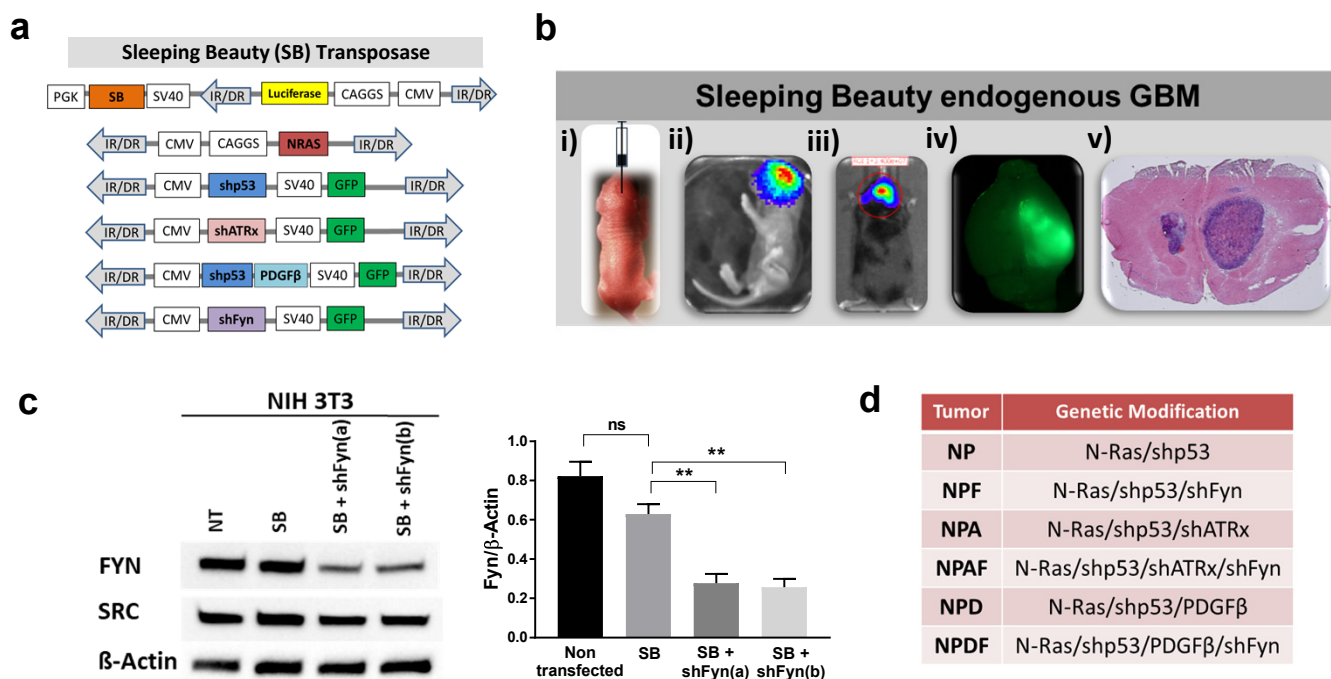

**Fig. 5: Genetically engineered mouse glioma models for Fyn downregulation**

**a)** Schematic representation of the Sleeping Beauty Transposon System (SB) plasmids used to generate gliomas with Fyn downregulation. Plasmids include the following DNA sequences: Luciferase, NRAS-GV12, shATRX-GFP, shP53-GFP, shP53-PDGFβ-GFP and shFyn-GFP). **b)** Representative pictures showing tumor development in the SB genetically engineered mouse model: i) plasmid injection in P1 neonatal mice. ii) bioluminescence imaging of a neonatal mouse 1-day post injection (1 dpi) confirming the efficiency of transduction; iii) bioluminescence showing tumor development in an adult mouse harboring NP-shFyn glioma at 120 dpi; iv) fluorescence image of a mouse brain harboring a NP-shFyn glioma tumor co-expressing GFP at protocol end point; v) H&E staining of a NP-shFyn brain tumor sections at protocol end point. **c)** Western Blot (WB) analysis shows downregulation of Fyn levels. NIH-3T3 mouse cells transfected for 48 hours with the corresponding vectors. NT: Non-transfected cells, SB: cells transfected with the SB transposon vector. SB+shFyn: cells transfected with the SB transposon vector in addition to shFyn(a): HP\_106460 or shFyn(b): HP\_292369. WB shows that expression levels of Src were unchanged with transfection of the SB+shFyn vectors. β-actin was used as loading control. Bar graphs represent the quantitative analysis of the WB. Values were calculated by normalizing Fyn band density to the band density of β-actin. Quantification was performed using ImageJ software. WB quantifications performed in 3 independent experiments. Statistical significance was determined using One-way ANOVA test. \*\*p < 0.01, ns: non-significance. Error bars represent ±SEM. **e)** Genotypes of the different SB tumors generated are indicated in the table.

**Fig. 6**

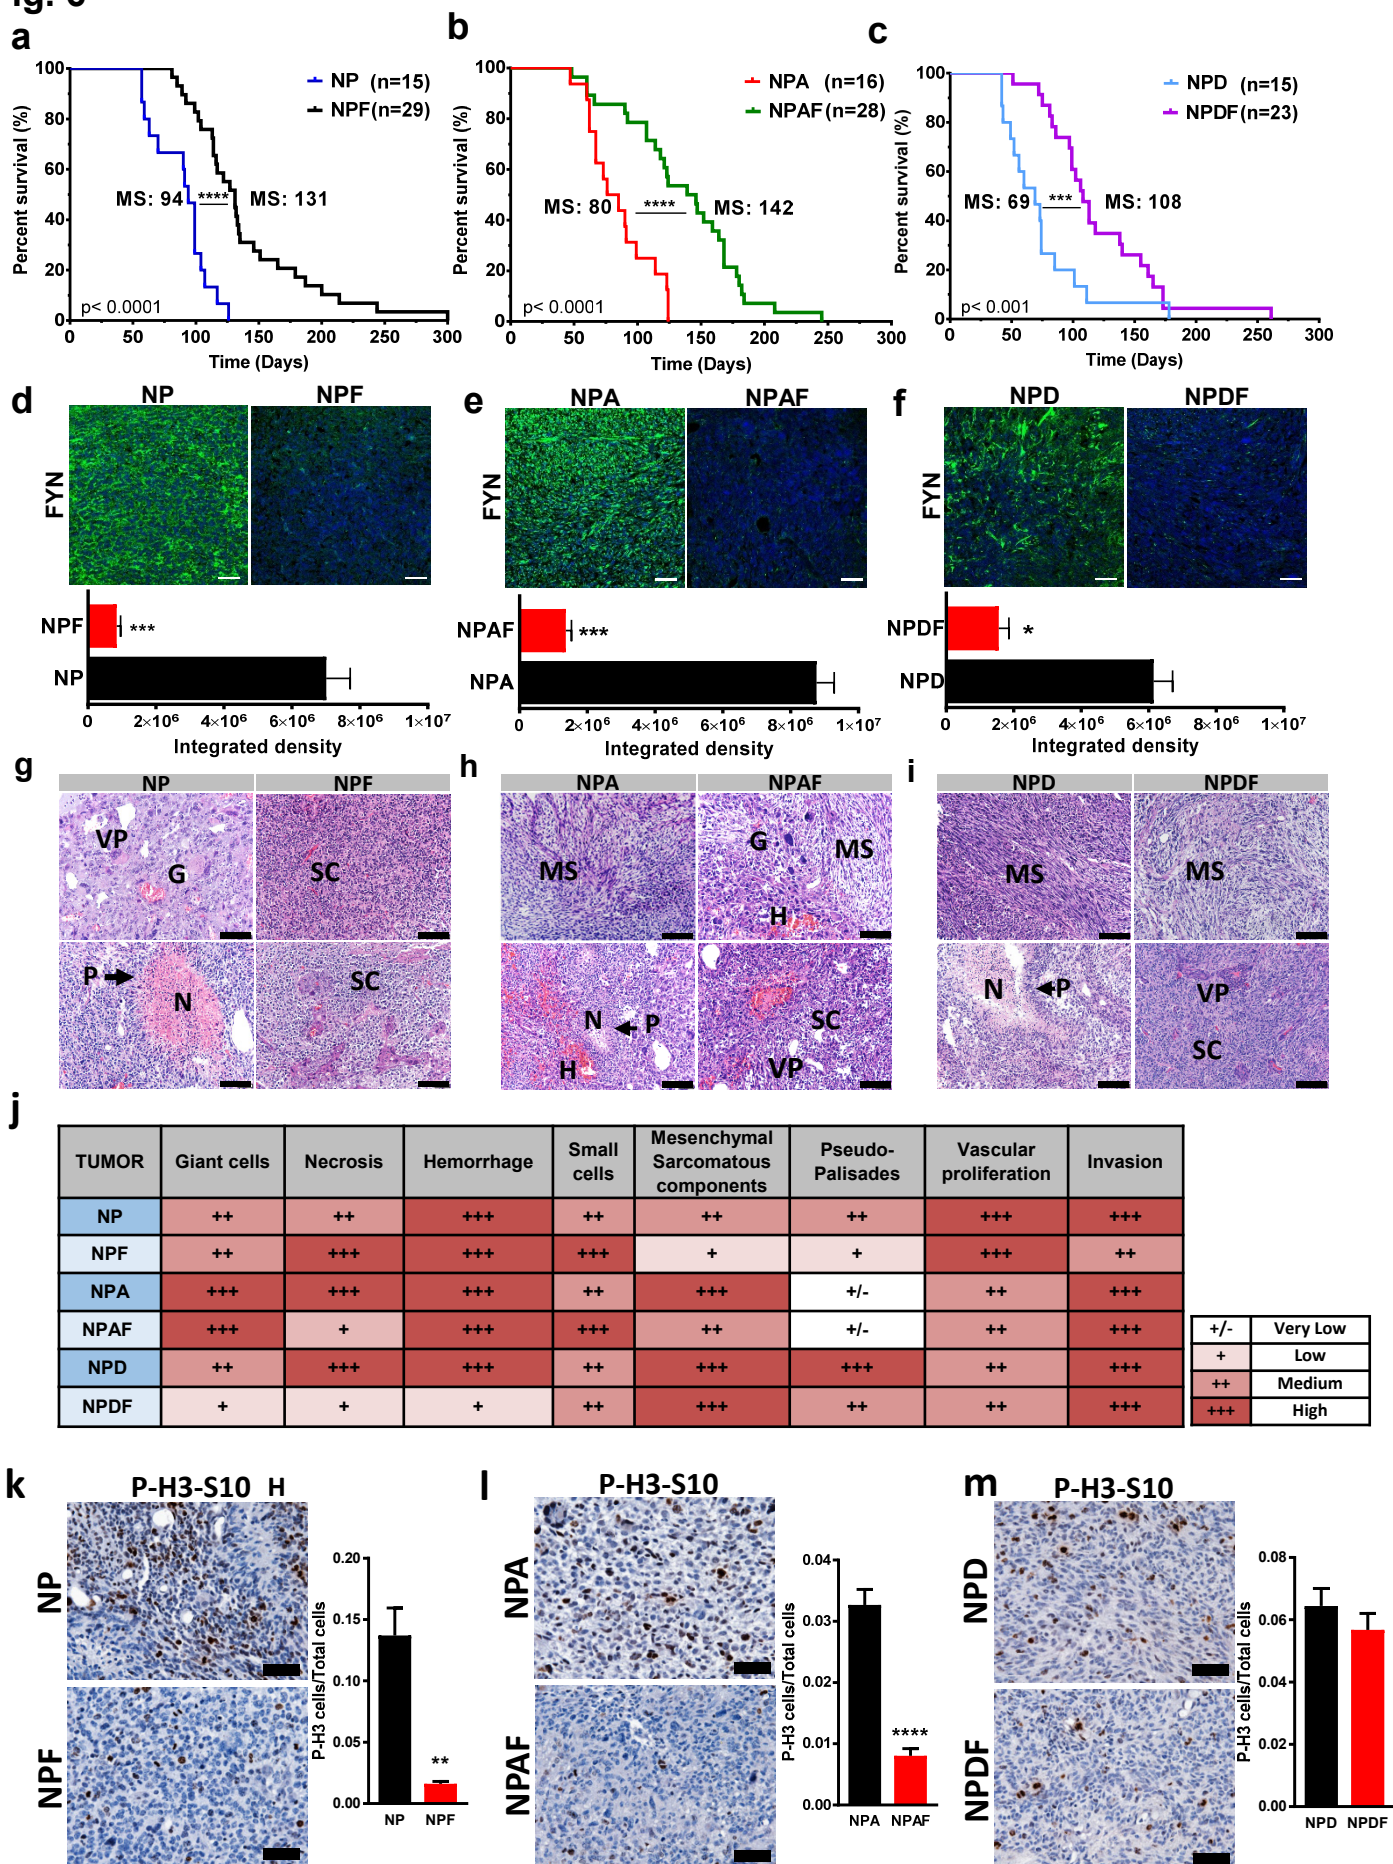

**Fig. 6: *In vivo* studies: Fyn knockdown in genetically engineered mouse glioma models increases median survival and decreases tumor malignancy.**

**a, b, c)** SB mouse glioma models demonstrate that animals bearing Fyn downregulation tumors exhibit a significant increase in median survival (MS). **(a)** Kaplan–Meier survival curve comparing NP (MS: 94 days; n: 15) versus NPF (MS: 131 days; n: 29). **(b)** Kaplan–Meier survival curve comparing NPA (MS: 80 days; n: 16) versus NPAF (MS: 142 days; n: 28). **(c)** Kaplan–Meier survival curve comparing NPD (MS: 69 days; n: 15) versus NPDF (MS: 108 days; n: 23). Log-rank (Mantel-Cox) test. \*\*\*  $p < 0.001$ , \*\*\*\* $p < 0.0001$ . **d, e, f)** Analysis of Fyn expression in glioma tissues by immunofluorescence. Representative confocal images display Fyn expression in green (Alexa 488) and nuclei in blue (DAPI). Images (20x, 1240 x 1240 pixels). Scale bar: 50  $\mu\text{m}$ . Bar graphs represent Fyn quantification in terms of fluorescence integrated density determined by Image-J. Five animals for each experimental condition were used for the analysis. Ten fields of each tumor section were selected at random. Error bars represent  $\pm\text{SEM}$ . Linear mixed effects models. \*\*\* $p < 0.001$ , \* $p < 0.05$ . **g, h, i)** Representative pictures of the histopathological analysis performed in tumor sections stained with H&E comparing the shFyn knockdown tumors with their respective controls. Magnification: 20x. Scale bars: 100  $\mu\text{m}$ . Histopathological features. P: pseudo-palisades, N: necrosis, H: hemorrhage, VP: vascular proliferation, MS: mesenchymal sarcomatous components, SC: small cells, G: giant cells. **j)** Histopathological analysis. Glioma histopathological patterns of giant cells, necrosis, hemorrhage, small cells, mesenchymal sarcomatous component, pseudo-palisades and vascular proliferation were analyzed. Table represents the semi-quantitative analysis for the presence and abundance of markers: very low (+/-), low (+), Medium (++) and high (+++). **k, l, m)** Cell proliferation analysis in tumor sections performed by immunohistochemistry of P-H3-S10, which labels mitotically active cells. Positive P-H3-S10 cells were counted by Image-J software. Magnification: 40x. Scale bars: 50  $\mu\text{m}$ . Bar graphs represent number of P-H3-S10 positive cells per total cells in the visual field. Five animals from each experimental condition were used. Ten fields of each section were selected at random. Error bars represent  $\pm\text{SEM}$ . Linear mixed effects models. \*\*\* $p < 0.001$ , \*\* $p < 0.01$ .

**Fig. 7**

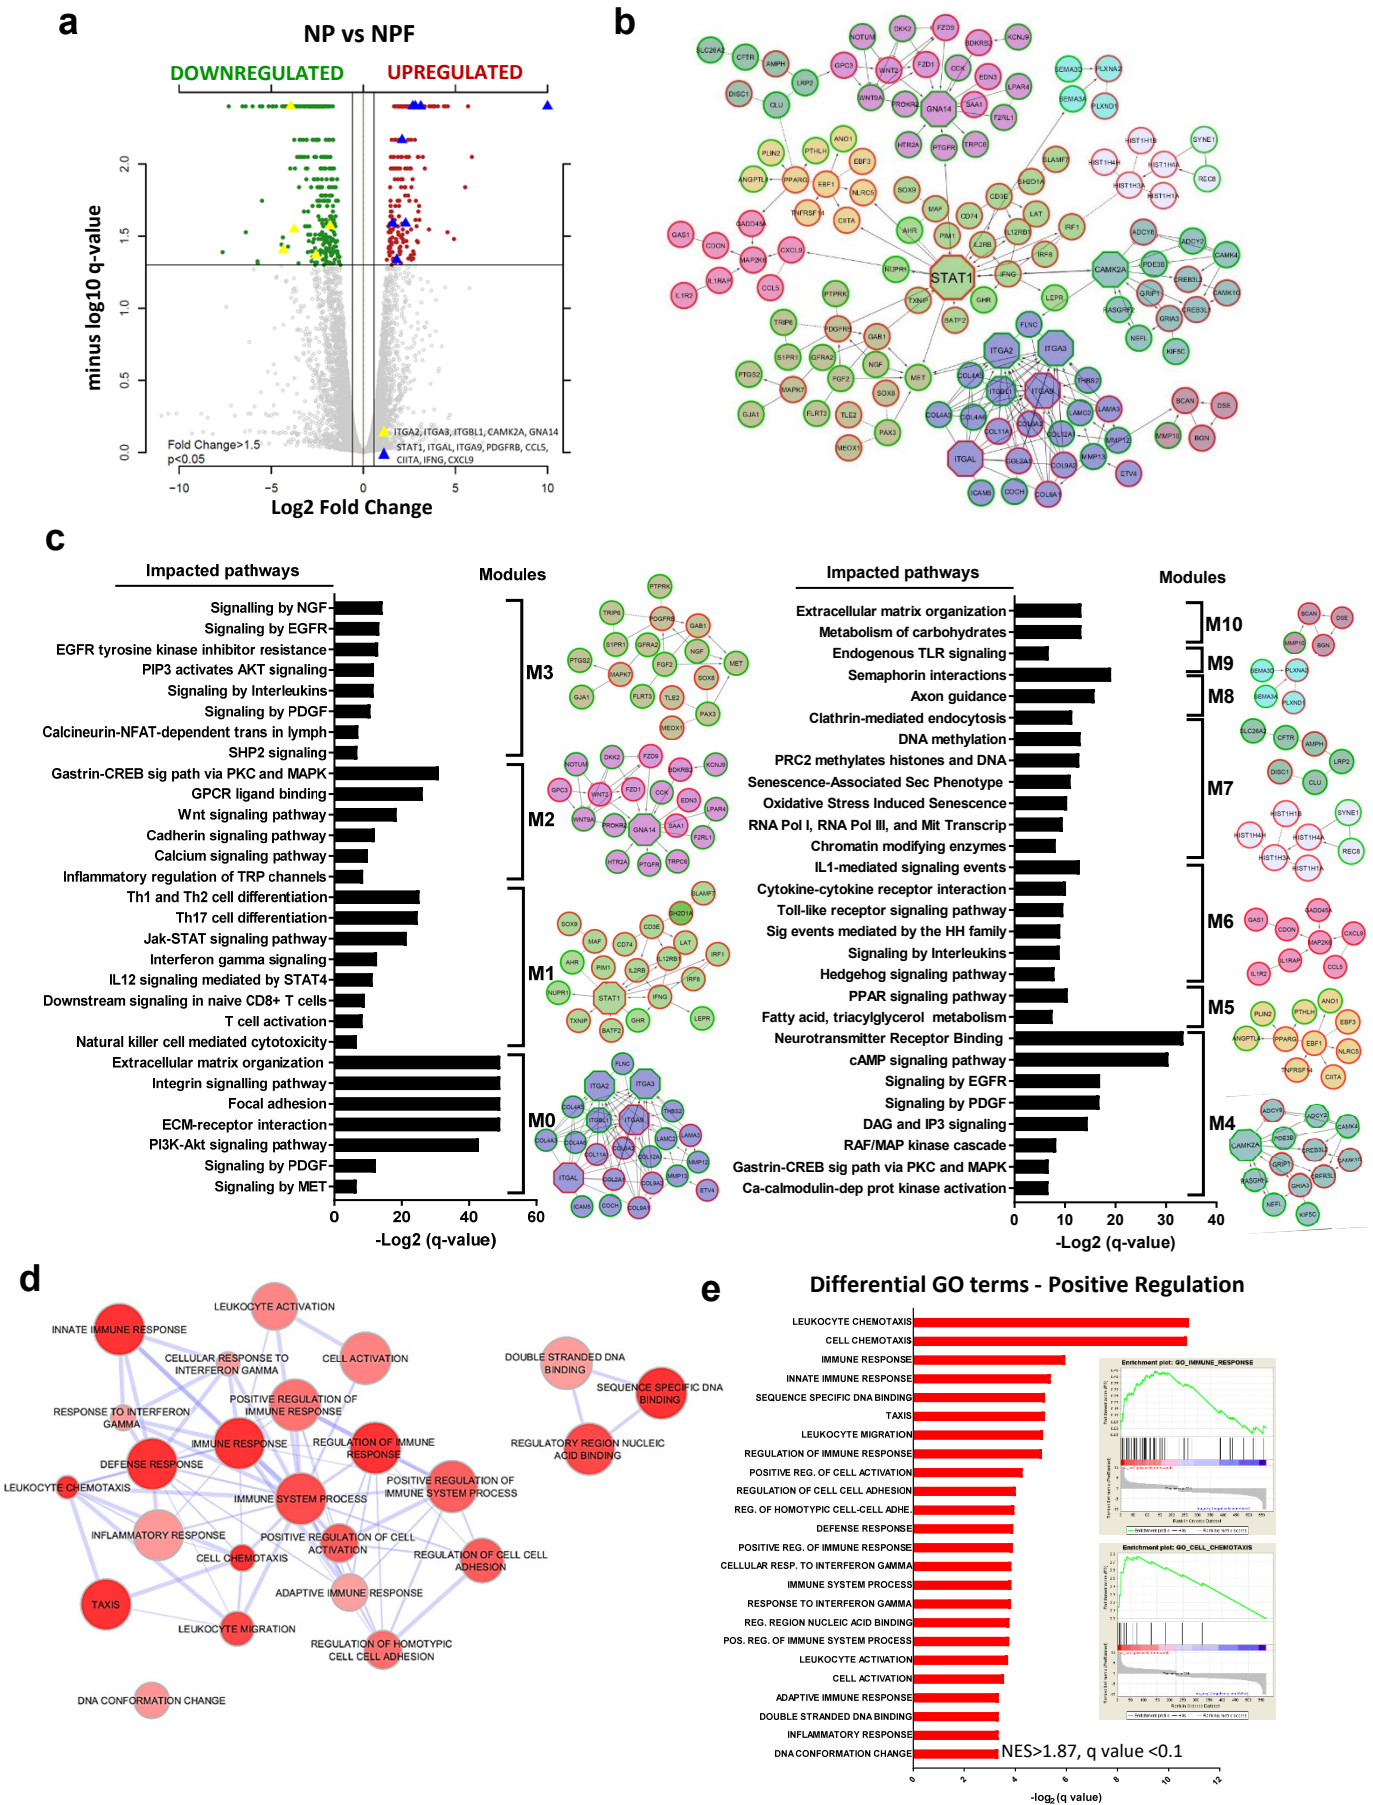



**Fig. 7: Enrichment in immune-related pathways and gene ontologies suggest immune regulation as a mechanism of Fyn-mediated tumor growth control.**

**a)** Volcano plot displays the DE genes from SB NPF vs SB NP mouse genetically engineered gliomas. Differentially expressed genes (n=567) were selected by fold change  $\geq 1.5$  and a q-value (FDR corrected p-value)  $< 0.05$ . Upregulated genes (n=226; red dots) and downregulated genes (n=341; green dots) are shown in A. Examples of genes that are upregulated (blue triangles) or downregulated (yellow triangles) are indicated in the lower right quadrant. The FDR-adjusted significance q-values were calculated using two-sided moderated Student's t-test. **b)** Network analysis of the DE genes comparing NPF versus NP mouse gliomas. Genes with a higher networks degree are highlighted with larger octagonal nodes. Clusters of nodes with the same color illustrate modules of highly interacting groups of genes in the network. Nodes with red border indicate upregulated genes and green borders indicate downregulated genes. **c)** Functional enrichment analysis of the pathways in each module of the network. Modules (nodes of the same color) represents a highly interacting group of genes in the network. The bar graph shows the overrepresented pathways plotted according to the minus Log<sub>2</sub> FDR q-value (FDR). Pathways' selection cutoff was set at a q-value $<0.01$ . **d)** Gene set enrichment analysis (GSEA) DE genes comparing NPF tumors versus NP tumors. Figure displays the enrichment map of the most significant upregulated GO terms (red nodes) in NPF gliomas at FDR $<0.1$  and p $<0.05$ . No downregulated gene ontologies were significantly enriched at these statistical cutoffs. Node color indicates p-value; size indicates the frequency of the GO term in the GO database. **e)** Functional enrichment analysis of overrepresented upregulated GO terms in NPF tumors compared with NP. The cutoff of the GO terms was drawn at a normalized enrichment score (NES)  $>1.87$  and q-value $<0.1$ . Enrichment plots of two of the most significant GO terms: "Immune response" (right hand side, top panel) and "Cell Chemotaxis" (right hand side, lower panel). These plots show the profile of the Running ES Score & Positions of GeneSet Members on the Rank Ordered List.

**Fig. 8**

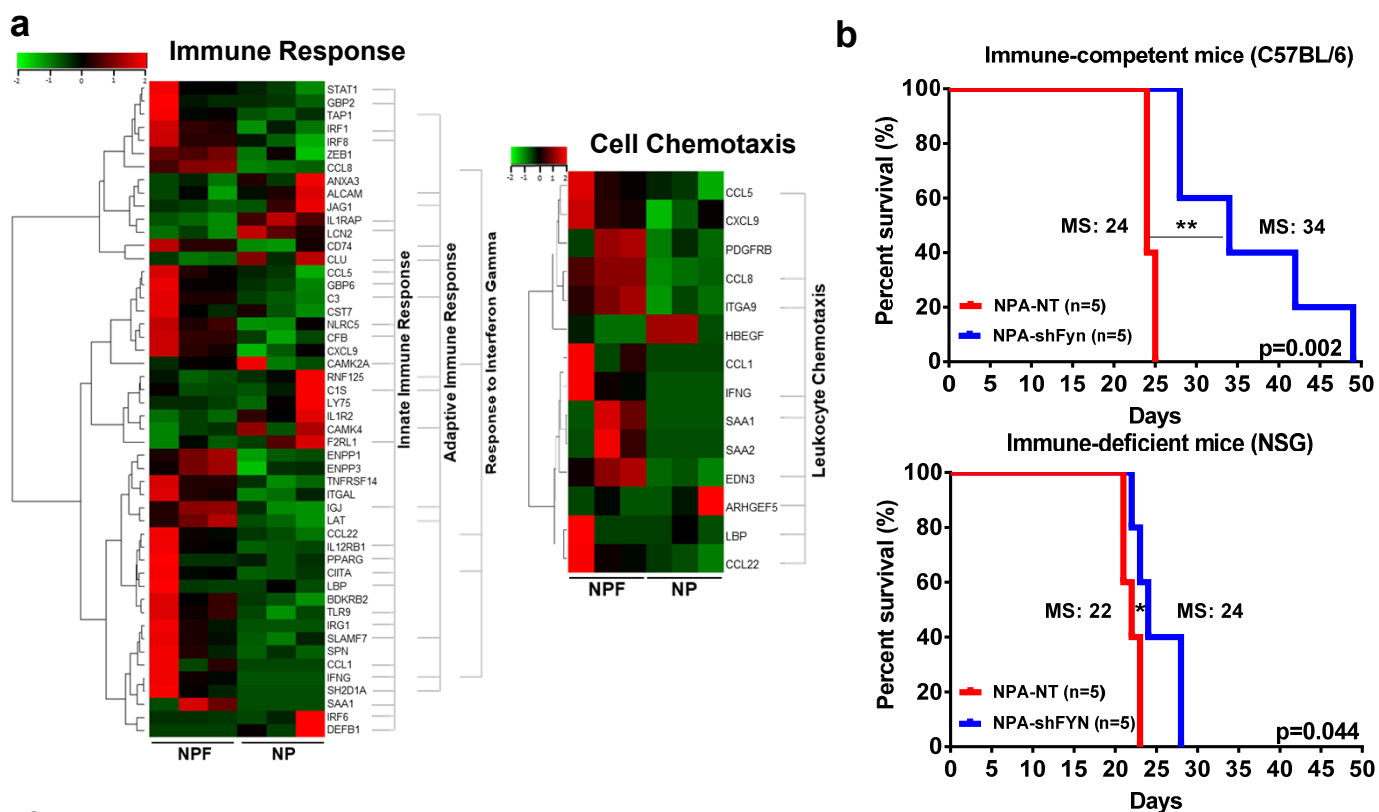

**c**

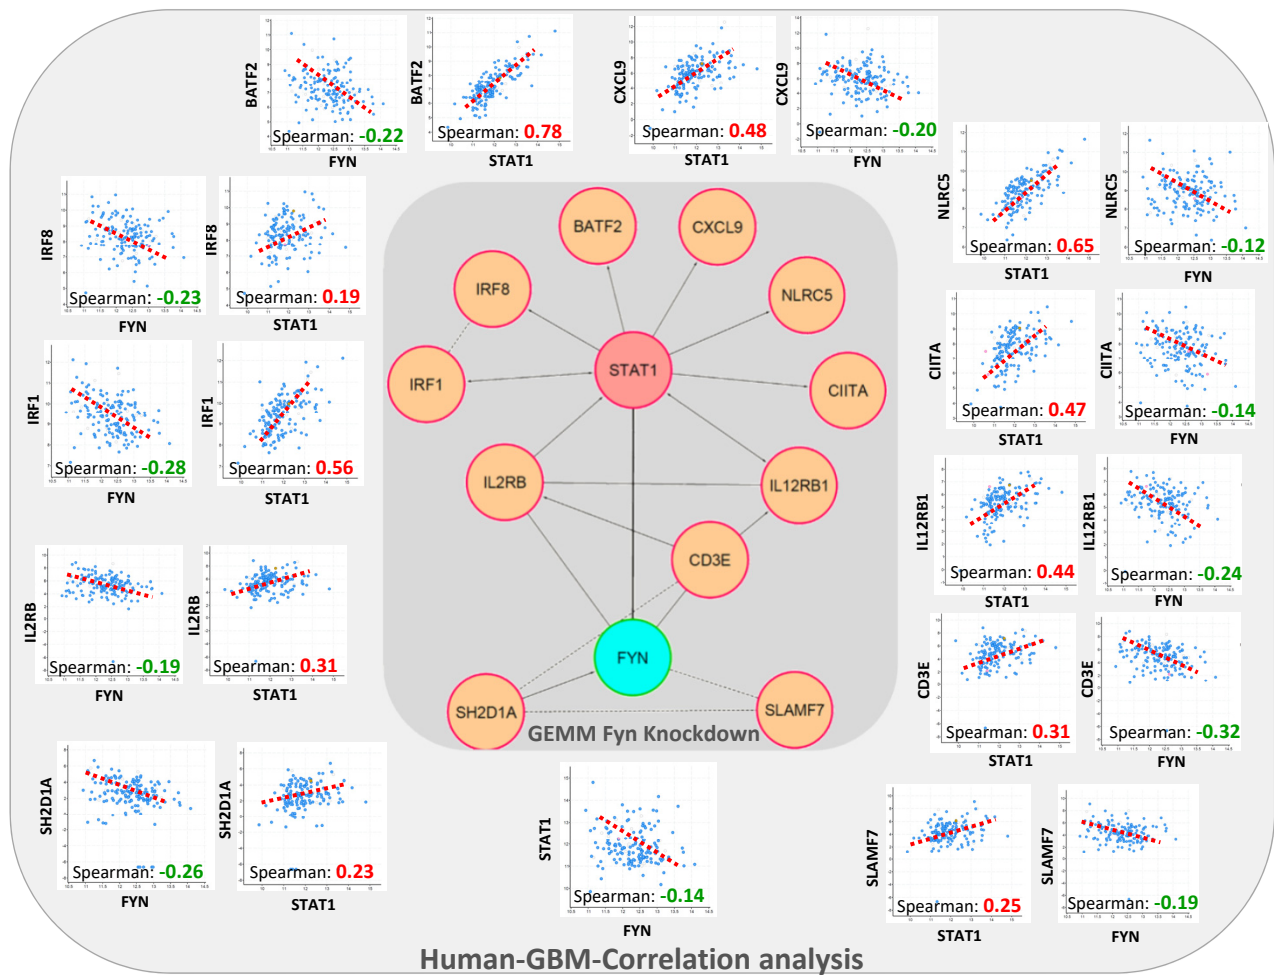

**Fig. 8: Fyn downregulation increases immune responses: modulation of the STAT1 signaling pathway.**

**a)** Heat maps illustrate gene expression pattern for Immune Response (left panel) and Cell Chemotaxis (right panel) GO terms in NPF vs. NP glioma tumors (3 biological replicates/group). Differentially upregulated genes are represented in red and downregulated genes are represented in green ( $q\text{-value} \leq 0.05$  and fold change  $\geq \pm 1.5$ ). On the right hand side of the Immune Response heat map, brackets highlight DE genes that are present in upregulated immune GOs: “Innate Immune Response”, “Adaptive Immune Response”, and “Response to Interferon Gamma”. To the right of the Cell Chemotaxis heat map, a bracket highlights DE genes that are also present in significantly upregulated the GO “leukocyte chemotaxis”. **b)** Kaplan–Meier survival curve of glioma tumors generated by intracranial implantation of  $3 \times 10^4$  NPA-NT and NPA-shFyn cells into adult C57BL6 and NSG mice. Immune-competent C57BL6 mice bearing tumors with Fyn knockdown displayed a higher increase in median survival vs controls (MS: 24 vs 34 days;  $**p=0.002$ ), while in immune-deficient mice the difference in survival was minor (MS: 22 vs 24 days;  $*p=0.044$ ). For survival analysis, five animals ( $n=5$ ) were used per experimental condition. Statistical analysis was determined by Log-rank (Mantel-Cox) test. **c)** Evaluation of the STAT1 signaling pathways using the gene expression and network analysis of the Fyn knockdown GEMM is shown in the central schematic. The correlations shown on the outside of this panel explore the relevance of the Fyn network in human samples of glioblastoma multiforme. We performed correlation analyses of FYN and STAT1 with DE genes identified from the Fyn network. Correlations of Fyn were opposite to those of STAT1. This indicates a similar inverse correlation to that encountered in mouse networks.
